# Supplementary material for: Single-Cell Transcriptome Analysis of H5N1-HA-Stimulated Alpaca PBMCs
Source: Biomolecules. 2022 Dec 28;13(1):60. doi: 10.3390/biom13010060 (PMC9855979; doi:10.3390/biom13010060)
Supplement: Supplementary file 1 [file biomolecules-13-00060-s001.zip]

Archive with 7 entries (7 files):
- Supplemental Table S1. Canonical markers of cell clusters.xls
- Supplemental Table S2. Composition of cell clusters in each sample.xls
- Supplemental Table S3. Proportations of Monocyte subsets in each sample.xls
- Supplemental Table S4. Proportations of B cell subsets in each sample.xls
- Supplemental Table S5. Differentialy expressed genes among B cell subsets.xlsx
- Supplemental Table S6. Proportations of T cell subsets in each sample.xlsx
- Supplementary Figures.pdf
