# Supplementary material for: Single-Cell Transcriptome Analysis of H5N1-HA-Stimulated Alpaca PBMCs
Source: Biomolecules. 2022 Dec 28;13(1):60. doi: 10.3390/biom13010060 (PMC9855979; doi:10.3390/biom13010060)
Supplement: Supplementary file 1 [file biomolecules-13-00060-s001.zip › Supplemental Table S1. Canonical markers of cell clusters.xls]

## Sheet: Sheet1
Cluster	Markers
CD4+ T	CD3+,CD4+,CD8-
CD8+ T	CD3+,CD4-,CD8+
DNT	CD3+,CD4-,CD8-
Monocyte	CD3+,CD14+
B	CD19+,MS4A1+,CD79A+,CD79B+
NK	CD3-,NKG7+,KLRB1+
DC	MZB1+,LAMP3+,VASH1+,IRF8+,IL3RA+,CD86+,KLF4+
