# Supplementary material for: Single-Cell Transcriptome Analysis of H5N1-HA-Stimulated Alpaca PBMCs
Source: Biomolecules. 2022 Dec 28;13(1):60. doi: 10.3390/biom13010060 (PMC9855979; doi:10.3390/biom13010060)
Supplement: Supplementary file 1 [file biomolecules-13-00060-s001.zip › Supplemental Table S2. Composition of cell clusters in each sample.xls]

## Sheet: Sheet1
	CD4+ T	CD8+ T	DNT	Monocyte	B	NK	DC
HA-0	0.3015	0.1293	0.164	0.2231	0.1439	0.0355	0.0027
HA-1	0.1963	0.1404	0.124	0.3439	0.174	0.0216	0.0008
HA-2	0.1412	0.1145	0.091	0.566	0.0768	0.0092	0.0014
