# Supplementary material for: Single-Cell Transcriptome Analysis of H5N1-HA-Stimulated Alpaca PBMCs
Source: Biomolecules. 2022 Dec 28;13(1):60. doi: 10.3390/biom13010060 (PMC9855979; doi:10.3390/biom13010060)
Supplement: Supplementary file 1 [file biomolecules-13-00060-s001.zip › Supplemental Table S3. Proportations of Monocyte subsets in each sample.xls]

## Sheet: Sheet1
	CD14+ Mono1	CD14+ Mono2	CD14+ Mono3
HA-0	0.56328	0.272359	0.164698
HA-1	0.518238	0.322886	0.158876
HA-2	0.545564	0.264825	0.189611
