# Supplementary material for: Single-Cell Transcriptome Analysis of H5N1-HA-Stimulated Alpaca PBMCs
Source: Biomolecules. 2022 Dec 28;13(1):60. doi: 10.3390/biom13010060 (PMC9855979; doi:10.3390/biom13010060)
Supplement: Supplementary file 1 [file biomolecules-13-00060-s001.zip › Supplemental Table S4. Proportations of B cell subsets in each sample.xls]

## Sheet: Sheet1
	Naive B	CD19low B	SELL- B	Plasma B
HA-0	0.411088	0.358264	0.186192	0.0444561
HA-1	0.364217	0.170927	0.13525	0.329606
HA-2	0.44469	0.30531	0.20354	0.0464602
