# Supplementary material for: Single-Cell Transcriptome Analysis of H5N1-HA-Stimulated Alpaca PBMCs
Source: Biomolecules. 2022 Dec 28;13(1):60. doi: 10.3390/biom13010060 (PMC9855979; doi:10.3390/biom13010060)
Supplement: Supplementary file 1 [file biomolecules-13-00060-s001.zip › Supplemental Table S5. Differentialy expressed genes among B cell subsets.xlsx]

## Sheet: Sheet1
gene	p_val	avg_log2FC	pct.1	pct.2	p_val_adj	cluster
LOC102531859	0	1.73258	0.924	0.352	0	Naive B
LOC102542585	4.78239e-172	0.937212	0.897	0.5	9.40601e-168	Naive B
LOC102535368	5.2989e-132	0.714499	0.98	0.944	1.04219e-127	Naive B
HVCN1	4.66568e-126	1.48799	0.517	0.208	9.17646e-122	Naive B
JUN	2.42411e-121	1.54679	0.671	0.423	4.76775e-117	Naive B
TSC22D3	2.78594e-113	1.02315	0.761	0.558	5.47939e-109	Naive B
RPS20	9.47275e-105	0.392973	0.999	0.991	1.8631e-100	Naive B
RPL35A	5.39139e-100	0.433042	0.995	0.984	1.06038e-95	Naive B
RPL39	9.36181e-100	0.489423	0.984	0.964	1.84128e-95	Naive B
LOC102534080	9.11687e-98	1.09821	0.675	0.45	1.79311e-93	Naive B
RPL23	6.45307e-89	0.411651	0.991	0.984	1.26919e-84	Naive B
RPL19	1.23111e-81	0.387759	0.993	0.972	2.42135e-77	Naive B
CXCR4	1.23742e-80	1.30344	0.369	0.152	2.43377e-76	Naive B
RPS18	3.64873e-77	0.338967	0.995	0.988	7.17633e-73	Naive B
UBALD2	4.90137e-76	0.864877	0.727	0.597	9.64001e-72	Naive B
LOC102526046	7.2183e-76	0.751428	0.802	0.726	1.41969e-71	Naive B
EIF1	1.18448e-74	0.603589	0.884	0.856	2.32964e-70	Naive B
RPL18	3.2303e-73	0.440158	0.978	0.951	6.35335e-69	Naive B
SRSF5	7.31384e-73	0.588662	0.896	0.867	1.43849e-68	Naive B
RPL11	5.09258e-72	0.371635	0.99	0.979	1.00161e-67	Naive B
FAU	7.06787e-69	0.416757	0.98	0.96	1.39011e-64	Naive B
FOS	8.9302e-69	1.06621	0.682	0.571	1.75639e-64	Naive B
RPS21	3.39935e-66	0.369161	0.986	0.978	6.68585e-62	Naive B
RPL37	4.69677e-63	0.340564	0.997	0.977	9.2376e-59	Naive B
RPL24	5.47314e-63	0.422143	0.979	0.974	1.07646e-58	Naive B
RPS23	6.59653e-62	0.352832	0.99	0.977	1.29741e-57	Naive B
DTNB	9.04937e-62	1.22909	0.279	0.105	1.77983e-57	Naive B
RPS8	1.57046e-58	0.288416	0.997	0.992	3.08878e-54	Naive B
ID3	3.37781e-56	1.07613	0.418	0.23	6.64348e-52	Naive B
CD83	3.80585e-55	1.13864	0.503	0.33	7.48535e-51	Naive B
RPL34	2.6461e-51	0.332922	0.98	0.973	5.20435e-47	Naive B
ZFP36L1	1.59846e-50	0.878742	0.533	0.37	3.14385e-46	Naive B
CD79B	3.65308e-47	0.635631	0.733	0.637	7.18488e-43	Naive B
RPS14	9.35535e-47	0.294496	0.988	0.978	1.84001e-42	Naive B
RPL14	3.68811e-46	0.334106	0.978	0.966	7.25377e-42	Naive B
RPS3	4.66344e-45	0.28383	0.988	0.976	9.17206e-41	Naive B
LOC102534820	5.04091e-45	0.695324	0.744	0.689	9.91446e-41	Naive B
RPS5	8.8683e-44	0.312841	0.982	0.967	1.74422e-39	Naive B
RPL32	1.29157e-42	0.330635	0.968	0.952	2.54026e-38	Naive B
BZW1	2.16038e-42	0.779106	0.657	0.602	4.24903e-38	Naive B
RPL37A	3.66948e-41	0.264405	0.994	0.982	7.21713e-37	Naive B
RPS6	8.15079e-39	0.31075	0.973	0.964	1.6031e-34	Naive B
RPL35	6.12928e-38	0.307218	0.981	0.967	1.20551e-33	Naive B
RPL22	2.02972e-37	0.345518	0.963	0.953	3.99206e-33	Naive B
FTH1	4.54696e-37	0.502969	0.803	0.781	8.94296e-33	Naive B
RPS3A	6.46997e-37	0.275346	0.986	0.974	1.27251e-32	Naive B
LOC102529542	6.99151e-37	1.17682	0.449	0.33	1.37509e-32	Naive B
RPS17	3.04495e-36	0.295839	0.973	0.965	5.98881e-32	Naive B
RPL38	3.06438e-36	0.281025	0.987	0.97	6.02702e-32	Naive B
UBD	1.33597e-35	0.816002	0.41	0.256	2.62759e-31	Naive B
RPL31	2.22577e-34	0.268416	0.986	0.977	4.37764e-30	Naive B
RPS24	2.22852e-33	0.265067	0.988	0.973	4.38305e-29	Naive B
LOC102529173	2.42676e-32	0.404303	0.841	0.813	4.77296e-28	Naive B
RPS29	4.16554e-32	0.292181	0.96	0.938	8.19278e-28	Naive B
SPOCK2	7.17187e-32	0.972772	0.283	0.163	1.41056e-27	Naive B
FOSB	9.52876e-32	0.84282	0.435	0.309	1.87412e-27	Naive B
RPS4X	3.23149e-31	0.314235	0.945	0.932	6.35569e-27	Naive B
RPS16	7.55303e-31	0.268846	0.982	0.975	1.48553e-26	Naive B
RPS15A	3.03082e-30	0.270502	0.981	0.968	5.96102e-26	Naive B
RPS13	7.07745e-30	0.305009	0.943	0.934	1.39199e-25	Naive B
BIRC3	6.80042e-27	0.748072	0.486	0.375	1.33751e-22	Naive B
TMSB4X	2.90248e-26	0.256599	0.987	0.966	5.7086e-22	Naive B
H1-2	2.87856e-25	1.10272	0.256	0.153	5.66155e-21	Naive B
KLF2	1.31804e-24	0.557361	0.622	0.58	2.59233e-20	Naive B
LOC102533814	1.43236e-22	0.529123	0.715	0.717	2.81716e-18	Naive B
LOC102540084	3.51579e-22	0.586629	0.634	0.592	6.91487e-18	Naive B
ATF4	5.52371e-22	0.358958	0.857	0.878	1.0864e-17	Naive B
IRF8	8.60949e-22	0.715447	0.483	0.398	1.69331e-17	Naive B
LOC102533164	1.02308e-21	0.555935	0.579	0.509	2.0122e-17	Naive B
LTB	6.29683e-21	0.259231	0.855	0.727	1.23846e-16	Naive B
HNRNPDL	1.21891e-20	0.43722	0.715	0.727	2.39736e-16	Naive B
LOC102532266	6.33402e-20	0.645001	0.456	0.389	1.24577e-15	Naive B
CD19	1.23085e-19	0.73315	0.29	0.196	2.42083e-15	Naive B
FCRLA	2.36647e-19	0.628412	0.355	0.251	4.65438e-15	Naive B
RASGRP2	7.27526e-18	0.592739	0.482	0.416	1.4309e-13	Naive B
LOC102541901	1.65489e-17	0.303345	0.868	0.89	3.25485e-13	Naive B
LOC102526857	7.47955e-16	0.296007	0.803	0.821	1.47108e-11	Naive B
LIMD2	1.89334e-14	0.40725	0.701	0.687	3.72382e-10	Naive B
SAT1	3.54627e-14	0.405957	0.694	0.696	6.9748e-10	Naive B
CD22	3.73609e-14	0.621556	0.28	0.204	7.34814e-10	Naive B
EIF4A2	8.80513e-14	0.457518	0.64	0.68	1.73179e-09	Naive B
SH3BP5	1.48473e-13	0.519276	0.368	0.288	2.92017e-09	Naive B
LOC102534214	1.92082e-13	0.328483	0.7	0.719	3.77786e-09	Naive B
STAP1	2.63027e-13	0.732403	0.328	0.263	5.17322e-09	Naive B
LOC102532668	1.9192e-12	0.544861	0.437	0.375	3.77468e-08	Naive B
RESF1	2.0184e-12	0.641988	0.325	0.261	3.9698e-08	Naive B
LOC116276832	2.2359e-12	0.707906	0.295	0.232	4.39756e-08	Naive B
HSP90AB1	4.27854e-12	0.418069	0.657	0.656	8.41504e-08	Naive B
CIITA	6.49935e-12	0.581351	0.342	0.278	1.27829e-07	Naive B
CTSO	7.44726e-12	0.579269	0.317	0.249	1.46473e-07	Naive B
FCMR	1.13807e-11	0.561615	0.429	0.391	2.23836e-07	Naive B
RPL6	1.16924e-11	0.334294	0.731	0.765	2.29966e-07	Naive B
IFI16	9.74844e-10	0.694881	0.299	0.247	1.91732e-05	Naive B
SRRM2	6.39113e-09	0.430356	0.593	0.626	0.000125701	Naive B
SNRNP70	1.00505e-08	0.414091	0.68	0.734	0.000197673	Naive B
NFKB2	2.32364e-08	0.597367	0.311	0.265	0.000457013	Naive B
HNRNPA1	6.74475e-08	0.3532	0.639	0.688	0.00132656	Naive B
DUSP1	9.15274e-08	0.463404	0.44	0.42	0.00180016	Naive B
RIPOR2	1.02943e-07	0.497032	0.457	0.459	0.00202469	Naive B
EZR	1.16876e-07	0.553897	0.343	0.315	0.00229872	Naive B
CCND3	5.97169e-07	0.44113	0.371	0.339	0.0117451	Naive B
SNX2	1.30918e-06	0.544012	0.283	0.248	0.025749	Naive B
LOC107034080	1.965e-06	0.266777	0.652	0.695	0.0386477	Naive B
LOC102545667	6.9834e-06	0.275279	0.625	0.68	0.137349	Naive B
LOC102527463	9.89819e-06	0.265123	0.661	0.696	0.194678	Naive B
ITGB1BP1	1.99238e-05	0.505447	0.456	0.467	0.391862	Naive B
CD37	4.67107e-05	0.418709	0.253	0.22	0.918705	Naive B
DSTN	5.31569e-05	0.481448	0.272	0.242	1	Naive B
LOC102528575	9.43365e-05	0.376899	0.261	0.232	1	Naive B
LOC107035086	0.000126996	0.333827	0.611	0.645	1	Naive B
TMC8	0.000144201	0.483358	0.342	0.333	1	Naive B
LOC116279814	0.000197155	0.27182	0.628	0.696	1	Naive B
LOC102536216	0.000206522	0.416943	0.321	0.297	1	Naive B
SRSF7	0.000490273	0.342311	0.49	0.514	1	Naive B
SMARCE1	0.00150408	0.531119	0.317	0.321	1	Naive B
UBXN1	0.00198875	0.451222	0.409	0.425	1	Naive B
CLK1	0.00219508	0.430399	0.435	0.467	1	Naive B
CHD3	0.00341185	0.480936	0.269	0.254	1	Naive B
FAM78A	0.00478077	0.427239	0.32	0.325	1	Naive B
IFI30	0.0053248	0.265713	0.234	0.305	1	Naive B
RBM3	0.008269	0.25607	0.623	0.695	1	Naive B
ZBTB32	2.88256e-301	2.10555	0.501	0.04	5.66942e-297	SELL- B
NIBAN3	4.08323e-287	2.0499	0.804	0.182	8.03091e-283	SELL- B
SPIB	2.79774e-228	1.76504	0.725	0.178	5.5026e-224	SELL- B
CAMK2B	5.22748e-206	1.25476	0.266	0.006	1.02814e-201	SELL- B
LOC1025425851	2.70197e-151	1.27602	0.962	0.597	5.31423e-147	SELL- B
FCRL4	9.7009e-145	1.34236	0.315	0.037	1.90797e-140	SELL- B
TSPAN4	1.2752e-113	1.0693	0.394	0.085	2.50807e-109	SELL- B
LOC102542062	1.53261e-111	1.30094	0.324	0.059	3.01434e-107	SELL- B
SH3BP51	4.76284e-101	1.02876	0.654	0.252	9.36756e-97	SELL- B
FCRLA1	1.52822e-96	0.967317	0.616	0.226	3.0057e-92	SELL- B
LY86	8.64389e-92	0.999576	0.598	0.227	1.70008e-87	SELL- B
FAM162B	5.31279e-87	0.811683	0.366	0.091	1.04492e-82	SELL- B
CD79B1	3.96981e-78	0.793601	0.897	0.631	7.80783e-74	SELL- B
MX2	8.85183e-77	1.00088	0.354	0.098	1.74098e-72	SELL- B
ADAM8	3.97784e-76	0.90321	0.521	0.199	7.82362e-72	SELL- B
NCF4	2.6392e-75	0.948005	0.521	0.204	5.19078e-71	SELL- B
ARPC1B	2.76528e-73	0.612335	0.972	0.851	5.43875e-69	SELL- B
CRLF2	3.77393e-73	0.938849	0.264	0.058	7.42256e-69	SELL- B
LOC102541480	4.8976e-73	0.794254	0.589	0.246	9.6326e-69	SELL- B
FGD2	2.09542e-71	0.944918	0.5	0.193	4.12128e-67	SELL- B
ARL5C	3.68322e-71	0.863611	0.574	0.249	7.24415e-67	SELL- B
S100A10	2.51658e-67	0.967674	0.768	0.469	4.94962e-63	SELL- B
STX7	4.30934e-65	0.714389	0.345	0.104	8.4756e-61	SELL- B
CALM2	9.72036e-64	0.926021	0.695	0.39	1.9118e-59	SELL- B
ACP5	3.00519e-61	0.851385	0.763	0.474	5.91061e-57	SELL- B
BHLHE40	3.20459e-61	0.930693	0.311	0.094	6.30279e-57	SELL- B
MS4A1	2.53292e-60	0.79917	0.531	0.229	4.98175e-56	SELL- B
LOC116278557	4.21183e-60	1.67426	0.456	0.201	8.28383e-56	SELL- B
PGLS	1.09899e-59	0.9767	0.579	0.301	2.16149e-55	SELL- B
NAPSA	1.84233e-59	0.682673	0.548	0.234	3.6235e-55	SELL- B
BANK1	9.22521e-58	0.748176	0.676	0.35	1.81441e-53	SELL- B
SAT11	1.04966e-55	0.739941	0.88	0.658	2.06447e-51	SELL- B
TFEB	1.62769e-53	0.701362	0.278	0.082	3.20133e-49	SELL- B
FHL1	7.59328e-53	0.76589	0.393	0.149	1.49345e-48	SELL- B
CTSH	1.2125e-51	0.805745	0.596	0.315	2.38475e-47	SELL- B
PDCD4	2.29398e-51	0.750333	0.592	0.305	4.5118e-47	SELL- B
CD82	9.31713e-51	0.758141	0.355	0.134	1.83249e-46	SELL- B
SLC25A37	7.83281e-50	0.637594	0.307	0.103	1.54056e-45	SELL- B
PECAM1	1.02085e-47	0.700888	0.435	0.188	2.00781e-43	SELL- B
SYK	3.83121e-47	0.597165	0.253	0.076	7.53522e-43	SELL- B
MACF1	1.94324e-44	0.690181	0.529	0.273	3.82197e-40	SELL- B
LYN	9.02219e-43	0.68851	0.416	0.189	1.77448e-38	SELL- B
DNASE2	1.52072e-42	0.652547	0.656	0.391	2.99095e-38	SELL- B
LOC102536046	1.82483e-42	0.623659	0.647	0.373	3.58907e-38	SELL- B
SUSD3	9.76756e-42	0.663865	0.298	0.11	1.92108e-37	SELL- B
SLC35D2	1.77175e-41	0.539008	0.366	0.151	3.48468e-37	SELL- B
LOC102540473	5.90883e-41	0.32326	0.99	0.982	1.16215e-36	SELL- B
CLEC17A	1.15755e-40	0.489397	0.275	0.094	2.27667e-36	SELL- B
GRAP	2.66349e-40	0.559234	0.748	0.492	5.23855e-36	SELL- B
ANXA11	8.40005e-40	0.639077	0.513	0.264	1.65212e-35	SELL- B
LOC1025362161	4.06289e-39	0.523505	0.523	0.262	7.99089e-35	SELL- B
NLRC5	8.8197e-39	0.599717	0.353	0.15	1.73466e-34	SELL- B
POLB	3.41973e-38	0.567866	0.332	0.137	6.72593e-34	SELL- B
PDE7A	4.2474e-35	0.580591	0.422	0.207	8.35378e-31	SELL- B
GYPC	2.10408e-34	0.586996	0.679	0.442	4.1383e-30	SELL- B
VAMP8	3.12172e-34	0.551622	0.584	0.342	6.13979e-30	SELL- B
COLGALT1	3.47493e-34	0.660754	0.285	0.115	6.83449e-30	SELL- B
SMIM11A	1.47956e-33	0.533244	0.389	0.187	2.91e-29	SELL- B
PSMB8	3.29961e-33	0.591798	0.641	0.415	6.48968e-29	SELL- B
LOC102532249	6.24613e-33	0.501426	0.364	0.168	1.22849e-28	SELL- B
ARPC2	3.82292e-32	0.467364	0.815	0.621	7.51892e-28	SELL- B
LOC1025318591	3.93004e-32	0.417189	0.836	0.528	7.7296e-28	SELL- B
PLEKHO1	4.04665e-32	0.506203	0.277	0.111	7.95895e-28	SELL- B
TMSB10	1.93505e-31	0.318143	0.997	0.989	3.80585e-27	SELL- B
CD79A	3.40759e-31	0.444391	0.814	0.584	6.70204e-27	SELL- B
YPEL3	4.32341e-31	0.538126	0.593	0.357	8.50329e-27	SELL- B
PLBD1	7.1031e-31	0.477464	0.36	0.169	1.39704e-26	SELL- B
PTPN6	8.2495e-31	0.519874	0.552	0.33	1.62251e-26	SELL- B
NAA38	2.55483e-30	0.542722	0.409	0.214	5.02484e-26	SELL- B
MKNK2	3.91834e-30	0.397103	0.45	0.234	7.7066e-26	SELL- B
CALHM6	6.93472e-30	0.43864	0.309	0.134	1.36392e-25	SELL- B
GRHPR	1.65243e-29	0.615089	0.297	0.132	3.25e-25	SELL- B
FAHD2A	1.93101e-29	0.397345	0.394	0.197	3.79791e-25	SELL- B
PLEKHB2	4.31028e-29	0.50048	0.412	0.213	8.47746e-25	SELL- B
PTPRC	5.6448e-29	0.590835	0.605	0.403	1.11022e-24	SELL- B
C21H16orf74	7.22485e-29	0.503954	0.374	0.189	1.42098e-24	SELL- B
ATP6AP2	1.3677e-28	0.614911	0.34	0.17	2.69e-24	SELL- B
EPSTI1	1.45091e-28	0.454746	0.436	0.229	2.85365e-24	SELL- B
TAGLN2	1.67977e-28	0.494387	0.753	0.543	3.30377e-24	SELL- B
PAX5	1.88862e-28	0.408239	0.281	0.119	3.71455e-24	SELL- B
CTSZ	3.85919e-28	0.609211	0.543	0.342	7.59025e-24	SELL- B
UBLCP1	1.17352e-27	0.436498	0.311	0.145	2.30807e-23	SELL- B
LOC116283634	1.31245e-27	0.786703	0.567	0.355	2.58133e-23	SELL- B
FBXO6	1.46933e-27	0.319039	0.32	0.145	2.88989e-23	SELL- B
FAM168B	3.16379e-27	0.479391	0.341	0.169	6.22254e-23	SELL- B
CAPG	4.16441e-27	0.372814	0.332	0.156	8.19057e-23	SELL- B
LOC102541718	5.05239e-27	0.290868	0.996	0.982	9.93703e-23	SELL- B
GM2A	1.36157e-26	0.493886	0.258	0.113	2.67794e-22	SELL- B
IRF5	2.83971e-26	0.447689	0.491	0.28	5.58515e-22	SELL- B
RALGPS2	3.21916e-26	0.543196	0.335	0.169	6.33145e-22	SELL- B
ARAP1	1.06779e-25	0.428409	0.285	0.131	2.10013e-21	SELL- B
GPX1	1.61365e-25	0.436169	0.703	0.485	3.17373e-21	SELL- B
BIRC31	1.95068e-25	0.468098	0.603	0.382	3.83659e-21	SELL- B
LSP1	3.73791e-25	0.491021	0.631	0.427	7.35173e-21	SELL- B
ALDH2	6.52705e-25	0.346259	0.291	0.136	1.28374e-20	SELL- B
LAMTOR4	9.41611e-25	0.631653	0.481	0.296	1.85196e-20	SELL- B
PRDX5	1.77107e-24	0.511843	0.542	0.341	3.48334e-20	SELL- B
PSTPIP1	1.87338e-24	0.410741	0.278	0.13	3.68456e-20	SELL- B
TPM3	2.79282e-24	0.481093	0.722	0.514	5.49291e-20	SELL- B
VASP	3.25307e-24	0.309151	0.295	0.139	6.39813e-20	SELL- B
SLC20A1	3.68021e-24	0.594311	0.252	0.117	7.23824e-20	SELL- B
B2M	4.98612e-24	0.300041	0.985	0.937	9.8067e-20	SELL- B
NDUFB3	1.36323e-23	0.469371	0.414	0.235	2.6812e-19	SELL- B
FERMT3	1.44648e-23	0.344523	0.428	0.242	2.84495e-19	SELL- B
LOC1070350861	1.5952e-23	0.371946	0.788	0.599	3.13744e-19	SELL- B
BLOC1S2	1.65395e-23	0.399565	0.251	0.112	3.25299e-19	SELL- B
CMTM7	1.86048e-23	0.438133	0.552	0.351	3.65918e-19	SELL- B
WDR46	8.73085e-23	0.421525	0.316	0.162	1.71718e-18	SELL- B
PTMA	1.05487e-22	0.295836	0.994	0.967	2.07471e-18	SELL- B
CD81	1.10036e-22	0.433948	0.728	0.552	2.1642e-18	SELL- B
SRSF6	1.16984e-22	0.416998	0.647	0.446	2.30084e-18	SELL- B
MAP4K1	1.59563e-22	0.394367	0.292	0.143	3.13829e-18	SELL- B
PIP4K2A	1.84723e-22	0.430214	0.484	0.292	3.63313e-18	SELL- B
EIF3D	2.14033e-22	0.437169	0.598	0.404	4.20961e-18	SELL- B
ATP13A2	2.61875e-22	0.4732	0.36	0.2	5.15056e-18	SELL- B
LOC107035255	2.91304e-22	0.429907	0.33	0.173	5.72937e-18	SELL- B
RGS18	3.78737e-22	0.380073	0.315	0.163	7.44899e-18	SELL- B
ZNF830	5.8045e-22	0.506245	0.258	0.123	1.14163e-17	SELL- B
FLNA	6.15599e-22	0.391667	0.397	0.224	1.21076e-17	SELL- B
RIDA	1.48779e-21	0.434521	0.273	0.136	2.92619e-17	SELL- B
LOC102538267	1.62074e-21	0.352497	0.492	0.3	3.18766e-17	SELL- B
CCND31	1.72169e-21	0.385697	0.519	0.317	3.38623e-17	SELL- B
DAP	1.22339e-20	0.406126	0.413	0.242	2.40615e-16	SELL- B
PRKCB	2.98109e-20	0.39767	0.331	0.181	5.86321e-16	SELL- B
IFI161	3.10529e-20	0.288214	0.414	0.238	6.10749e-16	SELL- B
ARPC3	3.60718e-20	0.414213	0.627	0.448	7.0946e-16	SELL- B
RASSF2	5.92914e-20	0.395269	0.408	0.241	1.16614e-15	SELL- B
RAC2	6.20611e-20	0.359052	0.703	0.524	1.22062e-15	SELL- B
SMAD3	9.09881e-20	0.347852	0.3	0.157	1.78955e-15	SELL- B
TOMM5	1.15645e-19	0.355248	0.438	0.27	2.27451e-15	SELL- B
CARD11	1.54985e-19	0.333675	0.435	0.256	3.04825e-15	SELL- B
LOC102531437	1.70577e-19	0.307004	0.423	0.245	3.35491e-15	SELL- B
GRK6	1.8851e-19	0.361841	0.576	0.388	3.70762e-15	SELL- B
LOC102543555	2.10553e-19	0.392173	0.73	0.538	4.14116e-15	SELL- B
LOC1025274631	2.60037e-19	0.326026	0.804	0.658	5.11441e-15	SELL- B
NAP1L1	3.14798e-19	0.404028	0.695	0.527	6.19144e-15	SELL- B
SNF8	4.09875e-19	0.374077	0.385	0.228	8.06142e-15	SELL- B
LOC102540012	4.60237e-19	0.475847	0.33	0.188	9.05195e-15	SELL- B
SMCO4	5.28304e-19	0.33009	0.338	0.188	1.03907e-14	SELL- B
NADK	6.57048e-19	0.352251	0.3	0.163	1.29228e-14	SELL- B
LIMD21	8.01617e-19	0.320857	0.831	0.665	1.57662e-14	SELL- B
ORMDL3	8.08368e-19	0.340431	0.272	0.142	1.5899e-14	SELL- B
IKZF3	1.12936e-18	0.354902	0.321	0.176	2.22122e-14	SELL- B
MTCH1	1.14418e-18	0.312549	0.271	0.137	2.25037e-14	SELL- B
ARHGAP4	1.15083e-18	0.362278	0.448	0.279	2.26344e-14	SELL- B
CHMP4B	4.59995e-18	0.284514	0.368	0.212	9.04718e-14	SELL- B
TRANK1	6.23884e-18	0.344938	0.256	0.13	1.22705e-13	SELL- B
GABARAPL2	9.69882e-18	0.322418	0.355	0.205	1.90756e-13	SELL- B
SET	1.17354e-17	0.327997	0.635	0.445	2.30812e-13	SELL- B
CAPZB	1.18642e-17	0.330866	0.447	0.282	2.33345e-13	SELL- B
CTSO1	1.24869e-17	0.281681	0.418	0.247	2.45592e-13	SELL- B
JAK1	1.9601e-17	0.385799	0.475	0.308	3.85512e-13	SELL- B
TMEM123	2.13375e-17	0.293003	0.256	0.131	4.19666e-13	SELL- B
DEK	2.42183e-17	0.293213	0.481	0.301	4.76326e-13	SELL- B
ZFP36L11	2.467e-17	0.264061	0.612	0.399	4.85209e-13	SELL- B
RASGRP21	5.90163e-17	0.280313	0.608	0.408	1.16073e-12	SELL- B
NDUFB1	5.98895e-17	0.31331	0.463	0.296	1.17791e-12	SELL- B
ARGLU1	6.44467e-17	0.328743	0.807	0.658	1.26754e-12	SELL- B
TALDO1	7.04123e-17	0.353418	0.417	0.265	1.38487e-12	SELL- B
WDFY4	7.04763e-17	0.311006	0.54	0.366	1.38613e-12	SELL- B
LUC7L3	1.07853e-16	0.372204	0.479	0.312	2.12126e-12	SELL- B
PSMB9	1.11836e-16	0.324574	0.601	0.425	2.19959e-12	SELL- B
CLIC1	1.16456e-16	0.350993	0.639	0.453	2.29046e-12	SELL- B
ITGB1BP11	1.6208e-16	0.29944	0.606	0.434	3.18779e-12	SELL- B
STAT6	2.5863e-16	0.255289	0.375	0.222	5.08674e-12	SELL- B
POLR1D	2.77902e-16	0.397276	0.268	0.146	5.46577e-12	SELL- B
IFI301	3.62051e-16	0.300505	0.403	0.251	7.12082e-12	SELL- B
DSTN1	4.32617e-16	0.25936	0.385	0.227	8.5087e-12	SELL- B
COMMD7	5.39475e-16	0.264499	0.296	0.164	1.06104e-11	SELL- B
CXXC5	5.65658e-16	0.325218	0.258	0.137	1.11254e-11	SELL- B
RGS14	1.05924e-15	0.293145	0.33	0.192	2.08332e-11	SELL- B
NDUFA13	1.23243e-15	0.356404	0.511	0.344	2.42395e-11	SELL- B
ALDOA	1.28102e-15	0.369476	0.409	0.264	2.51951e-11	SELL- B
LOC102531316	1.36967e-15	0.424993	0.285	0.163	2.69387e-11	SELL- B
EMP3	1.85269e-15	0.369053	0.559	0.388	3.64387e-11	SELL- B
ATP5MC2	1.8744e-15	0.309662	0.679	0.486	3.68657e-11	SELL- B
LDHB	2.18244e-15	0.263566	0.703	0.534	4.29243e-11	SELL- B
BRI3	2.41107e-15	0.406655	0.379	0.237	4.74209e-11	SELL- B
DDX17	3.91633e-15	0.291793	0.494	0.328	7.70264e-11	SELL- B
POLR1C	6.93512e-15	0.302685	0.256	0.141	1.364e-10	SELL- B
POLR2L	1.07517e-14	0.319851	0.669	0.492	2.11464e-10	SELL- B
ARHGAP30	1.46468e-14	0.285082	0.558	0.393	2.88073e-10	SELL- B
MOB1A	1.92091e-14	0.340697	0.331	0.201	3.77805e-10	SELL- B
CCDC50	4.12588e-14	0.305464	0.539	0.382	8.11479e-10	SELL- B
RGS19	4.52846e-14	0.277526	0.319	0.187	8.90658e-10	SELL- B
SLC25A6	4.64417e-14	0.326226	0.816	0.676	9.13415e-10	SELL- B
PFN1	5.16665e-14	0.286851	0.705	0.543	1.01618e-09	SELL- B
HSP90AB11	5.69624e-14	0.324055	0.766	0.634	1.12034e-09	SELL- B
HCLS1	8.82914e-14	0.284895	0.329	0.199	1.73652e-09	SELL- B
SNX21	9.38075e-14	0.26131	0.38	0.238	1.845e-09	SELL- B
LOC107034836	1.04892e-13	0.284903	0.258	0.145	2.06301e-09	SELL- B
ARPC5	1.21764e-13	0.319232	0.423	0.282	2.39486e-09	SELL- B
MBNL1	1.44387e-13	0.259652	0.335	0.206	2.83981e-09	SELL- B
SEPTIN6	2.6146e-13	0.369957	0.288	0.176	5.1424e-09	SELL- B
ESYT2	2.68587e-13	0.256553	0.413	0.268	5.28256e-09	SELL- B
LOC102531058	3.29148e-13	0.299853	0.445	0.303	6.47368e-09	SELL- B
HYI	3.47274e-13	0.265836	0.602	0.428	6.83019e-09	SELL- B
LOC102541404	3.98071e-13	0.252435	0.7	0.541	7.82926e-09	SELL- B
CDC26	1.00861e-12	0.316274	0.253	0.147	1.98373e-08	SELL- B
TPI1	1.08417e-12	0.306758	0.529	0.379	2.13235e-08	SELL- B
ARHGDIB	1.70965e-12	0.28725	0.654	0.497	3.36255e-08	SELL- B
PSME1	1.73762e-12	0.274323	0.698	0.533	3.41756e-08	SELL- B
S100A6	2.12187e-12	0.499892	0.603	0.46	4.17329e-08	SELL- B
SH3BGRL	2.32847e-12	0.253388	0.317	0.197	4.57964e-08	SELL- B
SASH3	2.61155e-12	0.273988	0.253	0.148	5.1364e-08	SELL- B
GNAI2	2.88744e-12	0.282694	0.581	0.428	5.67901e-08	SELL- B
SOD1	3.08472e-12	0.250999	0.361	0.234	6.06703e-08	SELL- B
HSP90AA1	9.4536e-12	0.349788	0.715	0.584	1.85933e-07	SELL- B
MDH2	1.00121e-11	0.25811	0.428	0.296	1.96917e-07	SELL- B
LOC102542278	1.30276e-11	0.254242	0.763	0.614	2.56226e-07	SELL- B
LOC107032853	1.32592e-11	0.268809	0.523	0.371	2.60782e-07	SELL- B
NAA10	2.02418e-11	0.287864	0.389	0.269	3.98116e-07	SELL- B
FUS	2.08971e-11	0.267695	0.854	0.733	4.11003e-07	SELL- B
NDUFC1	5.95378e-11	0.269991	0.339	0.222	1.17099e-06	SELL- B
MTA2	1.30878e-10	0.254724	0.375	0.252	2.57411e-06	SELL- B
NPM1	1.4068e-09	0.26019	0.587	0.457	2.76689e-05	SELL- B
ROCK1	1.84551e-09	0.250117	0.266	0.17	3.62975e-05	SELL- B
BTK	2.45215e-09	0.318743	0.302	0.203	4.8229e-05	SELL- B
DUSP2	3.00017e-09	0.253554	0.329	0.217	5.90074e-05	SELL- B
ARF6	3.53907e-09	0.252846	0.559	0.431	6.96065e-05	SELL- B
YWHAQ	1.42156e-08	0.260321	0.361	0.259	0.000279592	SELL- B
TOMM6	2.01349e-06	0.307346	0.251	0.178	0.0396013	SELL- B
HMGN3	0	2.98411	0.673	0.074	0	CD19low B
VIM	7.68451e-282	2.14069	0.805	0.375	1.51139e-277	CD19low B
S100A61	2.93378e-198	1.60074	0.792	0.369	5.77015e-194	CD19low B
LOC102539976	2.71896e-177	0.582052	0.999	0.995	5.34766e-173	CD19low B
CRIP1	1.99609e-176	1.1732	0.919	0.614	3.92591e-172	CD19low B
HOPX	8.7245e-162	1.69658	0.517	0.154	1.71593e-157	CD19low B
LAPTM5	4.39069e-146	1.16903	0.844	0.608	8.63561e-142	CD19low B
GNG2	2.29392e-116	1.57457	0.349	0.09	4.51168e-112	CD19low B
S100A13	5.24165e-108	1.39412	0.447	0.158	1.03093e-103	CD19low B
LOC1025417181	5.05013e-100	0.51789	0.997	0.979	9.93259e-96	CD19low B
C21H1orf54	1.74395e-97	1.26258	0.444	0.166	3.43e-93	CD19low B
TMEM273	6.808e-90	1.19538	0.335	0.1	1.339e-85	CD19low B
LOC102530971	9.81689e-88	0.965253	0.649	0.366	1.93079e-83	CD19low B
IL32	2.57002e-80	0.749078	0.905	0.788	5.05472e-76	CD19low B
PCTP	9.87507e-75	1.04679	0.399	0.159	1.94223e-70	CD19low B
RNF130	2.72919e-74	1.05968	0.379	0.149	5.36776e-70	CD19low B
LOC102541374	3.88637e-72	0.437345	0.986	0.972	7.64371e-68	CD19low B
LTB1	8.52694e-71	0.727843	0.898	0.733	1.67708e-66	CD19low B
SELENOW	3.08943e-63	0.954102	0.445	0.222	6.07629e-59	CD19low B
FCER2	1.34809e-61	0.805584	0.254	0.074	2.65143e-57	CD19low B
ST3GAL6	1.98917e-61	0.901526	0.34	0.136	3.91231e-57	CD19low B
NFKBIA	1.75128e-60	0.964149	0.668	0.459	3.44442e-56	CD19low B
MGST3	1.97518e-60	0.96996	0.407	0.193	3.88479e-56	CD19low B
BCAS4	4.09457e-54	0.841538	0.307	0.122	8.05319e-50	CD19low B
TMSB101	9.73914e-54	0.36807	0.998	0.988	1.91549e-49	CD19low B
RPL13A	1.53678e-52	0.359114	0.995	0.984	3.02254e-48	CD19low B
SH3BGRL3	2.33717e-49	0.851407	0.422	0.227	4.59675e-45	CD19low B
ISY1	1.7799e-48	0.722195	0.631	0.427	3.5007e-44	CD19low B
PLAAT3	1.6494e-47	0.763211	0.397	0.199	3.24405e-43	CD19low B
SH3GLB2	2.21776e-47	0.803868	0.491	0.294	4.36188e-43	CD19low B
TPI11	5.63337e-45	0.79873	0.537	0.355	1.10797e-40	CD19low B
ITM2B	6.28487e-45	0.659995	0.712	0.554	1.23611e-40	CD19low B
RPS19	8.63279e-43	0.251038	0.998	0.995	1.6979e-38	CD19low B
GIMAP4	2.57013e-42	0.719636	0.704	0.552	5.05493e-38	CD19low B
RPS11	3.90433e-42	0.284557	0.991	0.984	7.67903e-38	CD19low B
ANXA6	6.98585e-42	0.753732	0.643	0.482	1.37398e-37	CD19low B
RPS27	2.72263e-40	0.283854	0.99	0.981	5.35487e-36	CD19low B
MYO1F	1.58659e-39	0.849915	0.259	0.111	3.12051e-35	CD19low B
DDX5	1.0414e-38	0.46695	0.926	0.876	2.04823e-34	CD19low B
MEF2C	2.41564e-38	0.713787	0.449	0.271	4.75107e-34	CD19low B
GSTP1	3.10441e-38	0.737667	0.311	0.154	6.10576e-34	CD19low B
MYL6	9.79609e-38	0.620909	0.759	0.651	1.9267e-33	CD19low B
ARPC5L	2.37613e-36	0.789345	0.466	0.303	4.67337e-32	CD19low B
ARL4A	5.72239e-35	1.00158	0.378	0.218	1.12548e-30	CD19low B
CCDC501	2.51841e-33	0.700791	0.529	0.364	4.95321e-29	CD19low B
TMSB4X1	5.79699e-33	0.286991	0.992	0.967	1.14015e-28	CD19low B
RPL27A	2.62029e-32	0.253497	0.989	0.978	5.15359e-28	CD19low B
DDIT4	7.86593e-32	0.832303	0.365	0.21	1.54707e-27	CD19low B
MYL6B	8.61052e-31	0.575212	0.726	0.624	1.69352e-26	CD19low B
MTSS1	2.26238e-30	0.66449	0.3	0.156	4.44965e-26	CD19low B
RNH1	3.9972e-30	0.56623	0.646	0.508	7.86169e-26	CD19low B
PDCD41	6.31151e-28	0.568341	0.472	0.309	1.24135e-23	CD19low B
CNDP2	8.10606e-28	0.797433	0.279	0.152	1.5943e-23	CD19low B
LOC102526223	9.77128e-28	0.359376	0.935	0.897	1.92181e-23	CD19low B
SELL	1.68726e-27	0.622272	0.388	0.237	3.3185e-23	CD19low B
RELT	4.45634e-26	0.545457	0.262	0.134	8.76473e-22	CD19low B
TP53I11	5.17664e-26	0.55297	0.495	0.334	1.01814e-21	CD19low B
KLF6	6.38402e-25	0.663526	0.402	0.261	1.25561e-20	CD19low B
CPZ	2.05486e-24	0.500003	0.264	0.137	4.04149e-20	CD19low B
CAPG1	2.99323e-24	0.559933	0.278	0.151	5.88708e-20	CD19low B
LGALS1	7.8616e-23	0.731273	0.312	0.19	1.54622e-18	CD19low B
CALM1	8.92775e-23	0.65252	0.45	0.332	1.75591e-18	CD19low B
METTL9	9.88229e-23	0.531861	0.491	0.356	1.94365e-18	CD19low B
PPDPF	1.19438e-22	0.428912	0.648	0.538	2.3491e-18	CD19low B
EML4	2.80332e-21	0.662795	0.309	0.188	5.51356e-17	CD19low B
CYTH1	3.04891e-21	0.512627	0.371	0.239	5.9966e-17	CD19low B
PIP4K2A1	9.69955e-20	0.506295	0.416	0.29	1.90771e-15	CD19low B
SYNE1	2.77104e-19	0.735566	0.294	0.185	5.45007e-15	CD19low B
HHEX	1.00794e-18	0.432349	0.257	0.145	1.98241e-14	CD19low B
LOC102542460	1.15669e-18	0.501592	0.418	0.305	2.27498e-14	CD19low B
IRF81	1.31483e-18	0.345071	0.53	0.395	2.58601e-14	CD19low B
CD44	4.53709e-18	0.620589	0.339	0.233	8.92355e-14	CD19low B
JUNB	5.83851e-18	0.491673	0.515	0.394	1.14832e-13	CD19low B
TXNIP	8.16651e-18	0.445447	0.424	0.298	1.60619e-13	CD19low B
ACTG1	8.80496e-18	0.59257	0.483	0.378	1.73176e-13	CD19low B
LOC1025422781	2.27121e-17	0.378272	0.698	0.618	4.46701e-13	CD19low B
SIGIRR	6.66607e-17	0.498658	0.361	0.247	1.31108e-12	CD19low B
FUS1	1.02461e-16	0.31333	0.809	0.733	2.01521e-12	CD19low B
EPSTI11	1.23773e-16	0.480426	0.347	0.232	2.43436e-12	CD19low B
DUT	1.27919e-16	0.48806	0.454	0.33	2.5159e-12	CD19low B
TBC1D1	1.34629e-16	0.439363	0.257	0.155	2.64789e-12	CD19low B
CD53	1.61582e-16	0.602386	0.342	0.243	3.178e-12	CD19low B
DNLZ	1.70814e-16	0.396623	0.599	0.496	3.35957e-12	CD19low B
GPR132	2.38949e-16	0.539247	0.379	0.273	4.69964e-12	CD19low B
APBB1IP	3.53709e-16	0.422818	0.254	0.154	6.95676e-12	CD19low B
WSB1	4.6527e-16	0.364707	0.386	0.262	9.15094e-12	CD19low B
PTP4A2	3.24689e-15	0.473764	0.591	0.506	6.38598e-11	CD19low B
ARF61	4.55941e-15	0.440072	0.522	0.427	8.96745e-11	CD19low B
C34H12orf57	5.59015e-15	0.393169	0.708	0.631	1.09947e-10	CD19low B
SERPINB1	6.86856e-15	0.52707	0.327	0.226	1.35091e-10	CD19low B
RASSF3	1.07196e-14	0.412542	0.544	0.431	2.10833e-10	CD19low B
LOC102541537	1.84788e-14	0.474709	0.356	0.256	3.6344e-10	CD19low B
CAPZB1	1.88575e-14	0.495042	0.38	0.284	3.70889e-10	CD19low B
MFNG	2.57186e-14	0.472129	0.452	0.354	5.05832e-10	CD19low B
LOC1025322491	3.00172e-14	0.398379	0.271	0.175	5.90378e-10	CD19low B
LOC102535226	1.12513e-13	0.421337	0.449	0.349	2.21291e-09	CD19low B
DDX3X	1.17564e-13	0.43138	0.512	0.422	2.31226e-09	CD19low B
ETS1	1.30771e-13	0.400087	0.324	0.222	2.572e-09	CD19low B
LOC102528768	1.77518e-13	0.538546	0.275	0.186	3.49143e-09	CD19low B
LOC1025435551	4.86918e-13	0.350724	0.627	0.55	9.5767e-09	CD19low B
BANF1	1.33834e-12	0.436599	0.432	0.341	2.63224e-08	CD19low B
GPX11	1.47093e-12	0.336632	0.587	0.497	2.89303e-08	CD19low B
MED21	1.50412e-12	0.366534	0.319	0.223	2.95829e-08	CD19low B
LOC102540799	1.60167e-12	0.293128	0.741	0.705	3.15016e-08	CD19low B
LOC102540543	1.88909e-12	0.500328	0.271	0.188	3.71546e-08	CD19low B
WDFY41	1.98668e-12	0.446287	0.465	0.37	3.9074e-08	CD19low B
LOC102532908	4.68379e-12	0.337252	0.444	0.339	9.21209e-08	CD19low B
PFN11	4.97199e-12	0.370203	0.62	0.552	9.7789e-08	CD19low B
SNX3	6.50949e-12	0.425572	0.353	0.262	1.28029e-07	CD19low B
LOC102546034	9.45957e-12	0.41471	0.284	0.199	1.86051e-07	CD19low B
IFI6	2.7949e-11	0.517391	0.32	0.238	5.49701e-07	CD19low B
S100A101	1.00844e-10	0.332	0.587	0.495	1.9834e-06	CD19low B
ARHGAP45	2.30094e-10	0.305174	0.601	0.531	4.52548e-06	CD19low B
ADD1	2.47774e-10	0.369746	0.342	0.263	4.87321e-06	CD19low B
PLEKHF2	2.96113e-10	0.423679	0.306	0.23	5.82395e-06	CD19low B
EIF3G	3.45487e-10	0.314311	0.66	0.618	6.79504e-06	CD19low B
TAGLN21	5.46154e-10	0.350604	0.619	0.563	1.07418e-05	CD19low B
LOC1025360461	6.07376e-10	0.281398	0.489	0.393	1.19459e-05	CD19low B
TCF4	7.00852e-10	0.424041	0.35	0.273	1.37844e-05	CD19low B
IRF51	1.42124e-09	0.315915	0.381	0.291	2.79529e-05	CD19low B
CAPZA1	1.92662e-09	0.439926	0.275	0.205	3.78928e-05	CD19low B
ITGB1	3.16826e-09	0.464254	0.278	0.205	6.23134e-05	CD19low B
RASA3	3.69072e-09	0.264639	0.59	0.522	7.2589e-05	CD19low B
MLLT6	7.47785e-09	0.356339	0.25	0.178	0.000147074	CD19low B
RAP1A	1.59555e-08	0.458746	0.339	0.273	0.000313812	CD19low B
NUB1	1.63707e-08	0.415663	0.253	0.184	0.000321978	CD19low B
ARPC21	2.25894e-08	0.25864	0.693	0.639	0.000444288	CD19low B
CMTM71	3.83087e-08	0.320172	0.434	0.367	0.000753456	CD19low B
DUSP21	4.57545e-08	0.469387	0.285	0.218	0.000899899	CD19low B
ANXA111	5.49958e-08	0.328226	0.359	0.286	0.00108166	CD19low B
SARS1	7.11763e-08	0.368503	0.491	0.446	0.0013999	CD19low B
S100A4	1.46789e-07	0.367197	0.29	0.222	0.00288706	CD19low B
HCLS11	2.31829e-07	0.340897	0.267	0.204	0.00455962	CD19low B
EDF1	3.1216e-07	0.318251	0.411	0.346	0.00613956	CD19low B
GNG5	4.08905e-07	0.316822	0.311	0.25	0.00804234	CD19low B
GIMAP6	4.12306e-07	0.387662	0.456	0.402	0.00810924	CD19low B
TRMT112	5.18464e-07	0.260488	0.526	0.46	0.0101971	CD19low B
IRF3	6.17449e-07	0.342786	0.265	0.207	0.012144	CD19low B
GMFG	9.57981e-07	0.272849	0.419	0.361	0.0188416	CD19low B
UBL4A	1.01508e-06	0.298658	0.25	0.191	0.0199646	CD19low B
YWHAB	1.14315e-06	0.31172	0.569	0.512	0.0224836	CD19low B
CDC42	1.16634e-06	0.305061	0.545	0.508	0.0229395	CD19low B
JPT1	2.15852e-06	0.329231	0.31	0.25	0.0424538	CD19low B
CNPPD1	3.4589e-06	0.266336	0.256	0.198	0.0680296	CD19low B
FXYD5	4.22104e-06	0.343721	0.353	0.297	0.0830193	CD19low B
PHF1	4.80565e-06	0.251806	0.258	0.201	0.0945176	CD19low B
SH3BGRL1	5.13618e-06	0.282199	0.261	0.201	0.101018	CD19low B
CSRNP1	7.41505e-06	0.322613	0.273	0.224	0.145839	CD19low B
PAFAH1B3	7.44181e-06	0.274833	0.417	0.36	0.146365	CD19low B
LOC102542872	8.09762e-06	0.360239	0.26	0.208	0.159264	CD19low B
MFSD10	9.46124e-06	0.25053	0.282	0.226	0.186084	CD19low B
CD63	1.19938e-05	0.317566	0.36	0.309	0.235894	CD19low B
GADD45B	1.3476e-05	0.313845	0.463	0.416	0.265046	CD19low B
MCL1	1.46695e-05	0.372114	0.504	0.474	0.28852	CD19low B
CFDP1	1.9248e-05	0.357341	0.372	0.321	0.378569	CD19low B
IFNAR1	2.00421e-05	0.263418	0.315	0.257	0.394188	CD19low B
KLC1	3.98382e-05	0.278766	0.252	0.203	0.783538	CD19low B
C4H9orf16	4.11826e-05	0.279249	0.257	0.21	0.809979	CD19low B
RHOA	9.64259e-05	0.259551	0.443	0.402	1	CD19low B
ARPC31	0.00016547	0.258623	0.503	0.469	1	CD19low B
DDX1	0.000235984	0.268309	0.374	0.334	1	CD19low B
DENND4B	0.000366469	0.316498	0.261	0.22	1	CD19low B
ALDOA1	0.000453449	0.284198	0.314	0.279	1	CD19low B
PRDX2	0.000466116	0.256813	0.251	0.212	1	CD19low B
ARHGAP41	0.00047791	0.300923	0.339	0.296	1	CD19low B
PLP2	0.000481344	0.302083	0.253	0.213	1	CD19low B
PLEKHB21	0.000518139	0.25046	0.28	0.234	1	CD19low B
HNRNPM	0.000745579	0.27673	0.476	0.443	1	CD19low B
DNAJC7	0.000968764	0.29801	0.266	0.228	1	CD19low B
RAB24	0.00120371	0.282942	0.325	0.292	1	CD19low B
PSMB91	0.00267357	0.262205	0.473	0.448	1	CD19low B
CACYBP	0.00350623	0.276461	0.381	0.351	1	CD19low B
GZMA	0	6.40795	0.873	0.012	0	Plasma B
JCHAIN	0	6.21669	0.988	0.292	0	Plasma B
LOC116279899	0	6.01396	0.674	0.017	0	Plasma B
LOC102537117	0	5.38301	0.693	0.049	0	Plasma B
MZB1	0	5.05339	0.928	0.064	0	Plasma B
AQP3	0	4.63686	0.867	0.073	0	Plasma B
HSP90B1	0	4.05736	0.961	0.33	0	Plasma B
TXNDC5	0	3.94752	0.889	0.102	0	Plasma B
FKBP11	0	3.92074	0.835	0.057	0	Plasma B
LOC116279045	0	3.88614	0.728	0.083	0	Plasma B
LOC102536418	0	3.52383	0.822	0.159	0	Plasma B
SDF2L1	0	3.46501	0.857	0.076	0	Plasma B
RRBP1	0	3.44206	0.873	0.065	0	Plasma B
BHLHA15	0	3.23564	0.787	0.004	0	Plasma B
LOC102537749	0	3.02615	0.725	0.13	0	Plasma B
PDIA4	0	3.00053	0.879	0.084	0	Plasma B
PPIB	0	2.89787	0.964	0.531	0	Plasma B
RPN2	0	2.73551	0.823	0.088	0	Plasma B
LOC116278390	0	2.6025	0.54	0.01	0	Plasma B
SSR3	0	2.58367	0.83	0.136	0	Plasma B
CLDN3	0	2.54848	0.61	0.034	0	Plasma B
SEC61A1	0	2.53455	0.831	0.089	0	Plasma B
MANF	0	2.51074	0.76	0.063	0	Plasma B
RPN1	0	2.45795	0.799	0.095	0	Plasma B
EIF5B	0	2.42249	0.756	0.109	0	Plasma B
CALR	0	2.40659	0.889	0.238	0	Plasma B
LMAN1	0	2.40196	0.684	0.039	0	Plasma B
P4HB	0	2.37779	0.828	0.106	0	Plasma B
CRELD2	0	2.34125	0.733	0.053	0	Plasma B
TRAM1	0	2.31689	0.728	0.051	0	Plasma B
HM13	0	2.2681	0.713	0.056	0	Plasma B
ISG20	0	2.24143	0.646	0.015	0	Plasma B
DNAJB11	0	2.23617	0.674	0.043	0	Plasma B
LOC102531604	0	2.2262	0.587	0.013	0	Plasma B
TENT5C	0	2.20414	0.668	0.034	0	Plasma B
ERP29	0	2.20074	0.744	0.109	0	Plasma B
SEC61B	0	2.17029	0.794	0.176	0	Plasma B
XBP1	0	2.12583	0.753	0.092	0	Plasma B
PRDM1	0	2.10899	0.563	0.009	0	Plasma B
DDOST	0	1.98267	0.674	0.072	0	Plasma B
PRDX4	0	1.9817	0.66	0.085	0	Plasma B
HDLBP	0	1.96585	0.63	0.062	0	Plasma B
SLC39A7	0	1.96559	0.617	0.028	0	Plasma B
IDH2	0	1.92904	0.723	0.108	0	Plasma B
SURF4	0	1.90634	0.655	0.053	0	Plasma B
PDIA5	0	1.81861	0.641	0.051	0	Plasma B
ARFGAP3	0	1.77219	0.63	0.073	0	Plasma B
SPC24	0	1.67702	0.424	0.003	0	Plasma B
LOC102544664	0	1.663	0.448	0.01	0	Plasma B
TMEM214	0	1.63242	0.602	0.055	0	Plasma B
STT3A	0	1.63126	0.564	0.032	0	Plasma B
TMEM181	0	1.62866	0.496	0.008	0	Plasma B
LOC107035406	0	1.42706	0.405	0.009	0	Plasma B
TRAM2	0	1.41384	0.406	0.001	0	Plasma B
GALE	0	1.29954	0.42	0.006	0	Plasma B
NFXL1	4.54586e-308	1.6986	0.52	0.039	8.9408e-304	Plasma B
KDELR2	5.92975e-308	1.58687	0.586	0.06	1.16626e-303	Plasma B
TNFRSF17	5.80268e-306	1.69035	0.424	0.016	1.14127e-301	Plasma B
DNAJC3	4.67379e-305	1.96712	0.638	0.081	9.19241e-301	Plasma B
DERL1	1.14064e-303	1.63374	0.634	0.078	2.2434e-299	Plasma B
GOLGB1	1.71263e-301	2.24859	0.614	0.073	3.3684e-297	Plasma B
SPCS3	1.25523e-300	2.17889	0.787	0.18	2.46879e-296	Plasma B
SSR4	1.73513e-300	2.75758	0.928	0.525	3.41265e-296	Plasma B
LRRC59	3.80527e-300	1.38654	0.487	0.032	7.48421e-296	Plasma B
OSTC	2.00091e-297	1.67989	0.578	0.062	3.93539e-293	Plasma B
PDIA6	5.1978e-297	2.54462	0.849	0.268	1.0223e-292	Plasma B
PDIA3	1.22874e-291	2.43523	0.819	0.233	2.41669e-287	Plasma B
CLPTM1L	4.77967e-289	1.75243	0.74	0.132	9.40065e-285	Plasma B
TMED2	9.36135e-286	1.74454	0.689	0.116	1.84119e-281	Plasma B
NANS	9.45435e-285	1.20657	0.381	0.011	1.85948e-280	Plasma B
SRPRB	6.60019e-284	1.47325	0.524	0.048	1.29813e-279	Plasma B
TNFRSF18	1.27736e-283	1.78047	0.572	0.063	2.51232e-279	Plasma B
ELL2	4.80535e-280	1.33122	0.403	0.017	9.45117e-276	Plasma B
TMEM97	8.14914e-275	1.28363	0.401	0.018	1.60277e-270	Plasma B
CFD	8.56476e-274	2.86504	0.867	0.291	1.68452e-269	Plasma B
SLC38A5	1.05897e-271	1.33412	0.402	0.019	2.08278e-267	Plasma B
MCM2	1.02137e-270	1.53397	0.386	0.016	2.00883e-266	Plasma B
MRC2	3.47656e-269	1.39573	0.326	0.005	6.8377e-265	Plasma B
SEC11C	4.75951e-267	2.25166	0.875	0.361	9.361e-263	Plasma B
SPCS2	7.16498e-267	2.0271	0.741	0.174	1.40921e-262	Plasma B
SELENOS	6.3614e-261	2.00446	0.85	0.253	1.25116e-256	Plasma B
ADA	2.19978e-260	1.65198	0.668	0.11	4.32653e-256	Plasma B
IFRD2	8.58743e-259	1.32437	0.519	0.054	1.68898e-254	Plasma B
LOC102540390	3.19019e-258	1.35104	0.354	0.012	6.27446e-254	Plasma B
FKBP2	1.3585e-257	1.78636	0.765	0.17	2.6719e-253	Plasma B
RRM2	2.95029e-257	1.32228	0.291	0.001	5.80262e-253	Plasma B
ANAPC1	3.10544e-257	1.33696	0.472	0.041	6.10778e-253	Plasma B
SLC23A1	4.19228e-257	1.09333	0.32	0.006	8.24537e-253	Plasma B
HSPA5	1.22585e-256	2.11154	0.909	0.367	2.411e-252	Plasma B
LOC102543629	2.3637e-254	1.807	0.744	0.16	4.64892e-250	Plasma B
GPR15	6.54201e-252	1.18216	0.331	0.009	1.28668e-247	Plasma B
TMED9	7.38685e-252	2.17731	0.85	0.329	1.45285e-247	Plasma B
SND1	1.19488e-247	1.51229	0.578	0.082	2.35009e-243	Plasma B
TMEM258	6.21406e-247	2.07725	0.81	0.272	1.22218e-242	Plasma B
SEC23B	1.8936e-246	1.44164	0.497	0.052	3.72433e-242	Plasma B
LOC102532586	1.85954e-244	1.97973	0.449	0.039	3.65735e-240	Plasma B
UHRF1	2.08699e-244	1.10956	0.286	0.002	4.10469e-240	Plasma B
TMEM208	1.08931e-243	1.37955	0.584	0.083	2.14246e-239	Plasma B
HERPUD1	1.15733e-241	2.07258	0.867	0.283	2.27623e-237	Plasma B
BTD	1.2811e-240	0.925176	0.29	0.004	2.51967e-236	Plasma B
TMED3	4.19798e-239	1.41929	0.611	0.099	8.25658e-235	Plasma B
GOLGA4	1.04753e-234	2.00332	0.684	0.142	2.06028e-230	Plasma B
SLC1A5	1.0744e-234	1.21938	0.426	0.035	2.11313e-230	Plasma B
KIF22	1.37745e-232	1.13455	0.269	0.002	2.70917e-228	Plasma B
DAD1	5.31547e-232	1.63736	0.672	0.139	1.04545e-227	Plasma B
CASP3	7.39698e-232	1.21029	0.398	0.029	1.45484e-227	Plasma B
TARS1	1.9495e-231	2.01326	0.76	0.206	3.83428e-227	Plasma B
SLAMF1	2.12376e-230	1.15302	0.357	0.019	4.17701e-226	Plasma B
PVALB	4.34647e-230	1.20894	0.284	0.005	8.54863e-226	Plasma B
CANX	2.66204e-227	1.55424	0.638	0.122	5.2357e-223	Plasma B
SERP1	1.32742e-223	1.70775	0.769	0.219	2.61077e-219	Plasma B
ERLEC1	5.39042e-223	1.44633	0.539	0.08	1.06019e-218	Plasma B
SSR2	4.47382e-222	1.75391	0.836	0.31	8.7991e-218	Plasma B
SLC35B1	5.28328e-222	1.15428	0.457	0.048	1.03912e-217	Plasma B
DERL3	2.64339e-221	1.15577	0.491	0.059	5.19901e-217	Plasma B
GADD45A	1.06121e-220	1.26204	0.336	0.017	2.08719e-216	Plasma B
MAGT1	3.13521e-220	1.05994	0.363	0.023	6.16633e-216	Plasma B
RNASEH2B	7.82726e-218	1.46716	0.599	0.107	1.53946e-213	Plasma B
MCM3	1.51314e-212	1.36843	0.366	0.027	2.97603e-208	Plasma B
LAX1	4.43059e-212	1.36821	0.493	0.066	8.71409e-208	Plasma B
EAF2	1.98235e-211	1.23544	0.527	0.078	3.89889e-207	Plasma B
MGAT2	4.54911e-211	1.03206	0.408	0.037	8.9472e-207	Plasma B
CDT1	1.4135e-210	1.47078	0.379	0.031	2.78006e-206	Plasma B
MLPH	1.6175e-209	1.07049	0.315	0.014	3.18129e-205	Plasma B
CCND2	8.08102e-209	1.05345	0.378	0.03	1.58938e-204	Plasma B
UBA5	7.52524e-208	1.33633	0.532	0.082	1.48006e-203	Plasma B
GPRIN3	8.82715e-208	0.964417	0.267	0.006	1.73612e-203	Plasma B
MCM5	1.17278e-207	1.16799	0.351	0.024	2.30662e-203	Plasma B
LGMN	1.17646e-206	1.16805	0.426	0.045	2.31387e-202	Plasma B
DNAJB9	2.77167e-205	1.19368	0.448	0.052	5.45132e-201	Plasma B
DPAGT1	1.80236e-202	1.21272	0.542	0.087	3.54488e-198	Plasma B
ERGIC1	2.59297e-202	1.35979	0.588	0.112	5.09985e-198	Plasma B
C15H2orf81	8.86289e-202	0.912697	0.267	0.007	1.74315e-197	Plasma B
CKAP4	1.23173e-200	0.922023	0.3	0.014	2.42257e-196	Plasma B
SRM	5.80551e-199	0.870163	0.287	0.011	1.14183e-194	Plasma B
ARID3A	7.05327e-197	1.09557	0.387	0.038	1.38724e-192	Plasma B
RABAC1	2.13128e-195	1.5389	0.771	0.235	4.19179e-191	Plasma B
NCAPG	2.83676e-194	1.19545	0.311	0.018	5.57933e-190	Plasma B
TOP1	8.85405e-192	1.3865	0.567	0.106	1.74141e-187	Plasma B
SRPRA	1.43788e-191	1.14292	0.488	0.072	2.82802e-187	Plasma B
SMC2	3.26964e-190	1.01359	0.292	0.015	6.43072e-186	Plasma B
CENPF	7.64019e-190	1.71884	0.263	0.009	1.50267e-185	Plasma B
MAN1B1	2.21971e-189	1.34675	0.693	0.167	4.36573e-185	Plasma B
PHGDH	3.62111e-188	1.14547	0.323	0.023	7.12201e-184	Plasma B
SEC61G	1.19056e-186	1.75488	0.839	0.449	2.34159e-182	Plasma B
GMPPB	3.32904e-186	1.19997	0.432	0.055	6.54756e-182	Plasma B
KCNK6	6.88445e-185	0.976792	0.331	0.026	1.35403e-180	Plasma B
FBXW7	9.28901e-185	1.49581	0.566	0.109	1.82696e-180	Plasma B
SLC17A9	1.24376e-184	1.43605	0.592	0.123	2.44622e-180	Plasma B
PCNA	2.26161e-183	1.36816	0.424	0.055	4.44814e-179	Plasma B
TMBIM6	3.26316e-183	1.58194	0.763	0.26	6.41798e-179	Plasma B
STMN1	6.99961e-183	1.38582	0.44	0.062	1.37668e-178	Plasma B
SRP72	2.36145e-181	1.31871	0.511	0.089	4.6445e-177	Plasma B
ERGIC2	1.90565e-179	1.11428	0.426	0.056	3.74803e-175	Plasma B
USO1	3.22119e-179	1.17273	0.424	0.056	6.33544e-175	Plasma B
SEC63	2.86613e-176	1.23739	0.481	0.078	5.63711e-172	Plasma B
SEL1L3	3.46903e-175	1.1547	0.389	0.046	6.82289e-171	Plasma B
PPA1	3.91505e-175	1.14423	0.479	0.079	7.70012e-171	Plasma B
HEXB	4.17049e-175	1.28566	0.571	0.121	8.20252e-171	Plasma B
LOC107034840	5.31379e-175	1.46021	0.461	0.072	1.04512e-170	Plasma B
TSPAN13	9.29737e-174	1.07334	0.454	0.07	1.82861e-169	Plasma B
LOC102526714	9.94591e-174	1.93144	0.639	0.183	1.95616e-169	Plasma B
TMED10	1.16293e-172	1.00076	0.45	0.068	2.28726e-168	Plasma B
TM9SF1	1.2779e-171	0.764597	0.314	0.025	2.51337e-167	Plasma B
SMC4	5.24628e-171	1.41717	0.458	0.074	1.03184e-166	Plasma B
LOC107035021	2.22836e-170	1.41077	0.314	0.026	4.38273e-166	Plasma B
ACADS	5.46144e-170	1.09883	0.458	0.073	1.07416e-165	Plasma B
LSM8	5.69533e-169	1.00287	0.491	0.085	1.12016e-164	Plasma B
SPCS1	5.91702e-169	1.48552	0.739	0.249	1.16376e-164	Plasma B
MCOLN2	3.19081e-167	0.9854	0.402	0.053	6.27569e-163	Plasma B
CHD7	3.29459e-167	1.38229	0.446	0.071	6.4798e-163	Plasma B
ARMCX3	1.03083e-166	0.905946	0.29	0.021	2.02743e-162	Plasma B
LOC102533497	1.91829e-166	1.57875	0.311	0.026	3.7729e-162	Plasma B
TXN	4.35638e-166	1.5976	0.814	0.384	8.56814e-162	Plasma B
LOC116278559	5.15551e-166	2.18124	0.658	0.171	1.01399e-161	Plasma B
RPL36AL	5.71651e-165	1.516	0.799	0.337	1.12432e-160	Plasma B
ATP8B2	1.39883e-164	0.830244	0.277	0.018	2.75123e-160	Plasma B
GPAA1	2.30031e-164	1.07939	0.535	0.106	4.52425e-160	Plasma B
TACC3	8.45083e-164	1.37656	0.351	0.04	1.66211e-159	Plasma B
ARF4	4.00118e-163	1.10954	0.442	0.071	7.86952e-159	Plasma B
LOC102538411	1.27842e-162	1.43454	0.57	0.131	2.5144e-158	Plasma B
MAPK6	5.79237e-162	1.21666	0.491	0.092	1.13924e-157	Plasma B
LOC102546111	6.41404e-162	1.08584	0.461	0.078	1.26151e-157	Plasma B
AUP1	1.41387e-161	1.2788	0.66	0.176	2.7808e-157	Plasma B
TMEM50A	4.01837e-160	1.08233	0.503	0.098	7.90332e-156	Plasma B
GORASP2	9.06146e-160	0.808127	0.327	0.033	1.78221e-155	Plasma B
QPCTL	1.00952e-159	0.862331	0.261	0.015	1.98552e-155	Plasma B
SEC24D	1.86883e-159	0.90659	0.375	0.047	3.67562e-155	Plasma B
PIK3R5	2.43856e-159	1.03153	0.462	0.078	4.79616e-155	Plasma B
TXNDC11	6.25069e-159	1.25517	0.452	0.076	1.22939e-154	Plasma B
TPST2	1.04545e-157	1.0951	0.48	0.087	2.0562e-153	Plasma B
GANAB	4.50244e-157	1.0746	0.484	0.09	8.8554e-153	Plasma B
EZH2	3.51922e-156	1.02526	0.287	0.023	6.9216e-152	Plasma B
INSIG1	3.90189e-156	1.44788	0.605	0.155	7.67423e-152	Plasma B
MCM4	5.61667e-155	1.06969	0.343	0.041	1.10469e-150	Plasma B
POC1A	6.53683e-155	0.752848	0.253	0.015	1.28566e-150	Plasma B
MCPH1	2.03166e-152	1.05732	0.331	0.037	3.99588e-148	Plasma B
LMAN2	2.82543e-152	1.11972	0.68	0.196	5.55706e-148	Plasma B
SEC22B	9.9331e-151	0.801287	0.283	0.023	1.95364e-146	Plasma B
ITGB11	1.68354e-150	1.24606	0.598	0.154	3.31119e-146	Plasma B
FNDC3A	2.58027e-150	0.936969	0.342	0.041	5.07488e-146	Plasma B
TMCO1	1.81005e-149	1.03126	0.499	0.101	3.56e-145	Plasma B
SLC38A10	5.25329e-149	1.02094	0.412	0.065	1.03322e-144	Plasma B
LOC102533531	7.07109e-149	0.963438	0.263	0.019	1.39074e-144	Plasma B
LOC102541047	1.03234e-148	1.31113	0.382	0.055	2.03041e-144	Plasma B
FABP5	3.53652e-148	0.708292	0.282	0.024	6.95562e-144	Plasma B
NASP	4.01211e-148	1.35084	0.489	0.101	7.89101e-144	Plasma B
LOC102534079	3.88833e-147	1.05896	0.267	0.021	7.64757e-143	Plasma B
CCDC47	3.3558e-146	0.895889	0.327	0.038	6.60019e-142	Plasma B
SUCLG1	5.04693e-146	1.16738	0.651	0.187	9.92631e-142	Plasma B
MYDGF	8.4434e-146	0.983417	0.543	0.125	1.66065e-141	Plasma B
MPP1	2.18791e-145	1.14579	0.576	0.142	4.30318e-141	Plasma B
CLTA	2.6835e-145	1.07423	0.588	0.151	5.2779e-141	Plasma B
MCOLN3	5.58497e-145	1.14888	0.386	0.059	1.09845e-140	Plasma B
PRR5	2.23675e-144	0.825116	0.302	0.03	4.39924e-140	Plasma B
KCNA3	3.30263e-144	0.868237	0.284	0.027	6.49561e-140	Plasma B
KRTCAP2	8.84399e-144	1.42522	0.76	0.313	1.73944e-139	Plasma B
SMCHD1	1.87463e-143	1.14436	0.591	0.151	3.68701e-139	Plasma B
RNASEH2C	4.85553e-143	1.61617	0.68	0.254	9.54986e-139	Plasma B
MORF4L2	1.03704e-142	0.833441	0.296	0.03	2.03964e-138	Plasma B
NGLY1	2.11901e-142	0.770301	0.295	0.03	4.16767e-138	Plasma B
LOC102531066	3.71553e-140	0.902975	0.391	0.064	7.3077e-136	Plasma B
TRIP11	4.29579e-140	1.23732	0.33	0.043	8.44897e-136	Plasma B
MIA3	8.92946e-140	0.985866	0.418	0.073	1.75625e-135	Plasma B
TM9SF3	2.44547e-139	0.910654	0.412	0.071	4.80974e-135	Plasma B
LOC102541528	5.00009e-138	0.970125	0.493	0.108	9.83418e-134	Plasma B
GLIPR2	7.6725e-138	0.939108	0.48	0.1	1.50903e-133	Plasma B
TRIB2	1.28538e-136	0.825739	0.265	0.024	2.52808e-132	Plasma B
DNMT1	4.28417e-136	1.03825	0.347	0.049	8.42611e-132	Plasma B
CHPF	7.60937e-136	0.679596	0.259	0.022	1.49661e-131	Plasma B
RPS6KB1	1.7588e-135	1.217	0.595	0.161	3.45922e-131	Plasma B
CD164	2.4741e-135	0.967367	0.531	0.128	4.86605e-131	Plasma B
LOC102541707	5.12338e-135	2.03321	0.7	0.298	1.00767e-130	Plasma B
MGLL	4.46191e-134	0.917069	0.284	0.03	8.77568e-130	Plasma B
ERP44	1.76032e-133	0.787897	0.35	0.051	3.46219e-129	Plasma B
S100A41	2.15736e-133	1.26361	0.601	0.173	4.24309e-129	Plasma B
PGRMC2	2.90651e-133	0.848447	0.437	0.083	5.71653e-129	Plasma B
BCKDK	6.0689e-133	0.841993	0.327	0.044	1.19363e-128	Plasma B
DTYMK	9.97949e-133	0.806637	0.338	0.047	1.96277e-128	Plasma B
SAR1A	2.19823e-132	0.796712	0.295	0.034	4.32348e-128	Plasma B
MARS1	2.57749e-132	0.827266	0.288	0.031	5.0694e-128	Plasma B
SDF4	3.03799e-132	1.0102	0.568	0.148	5.97511e-128	Plasma B
SRP54	9.8878e-131	0.971295	0.378	0.064	1.94473e-126	Plasma B
VMP1	8.81178e-130	0.95528	0.48	0.106	1.7331e-125	Plasma B
CTSD	4.23686e-129	1.00805	0.493	0.113	8.33305e-125	Plasma B
LOC102533785	9.48486e-129	1.13704	0.261	0.026	1.86548e-124	Plasma B
MCUB	1.51735e-128	0.859253	0.32	0.043	2.98432e-124	Plasma B
ASPH	5.38028e-128	0.87425	0.257	0.025	1.05819e-123	Plasma B
SELENOF	9.97308e-128	0.732577	0.426	0.083	1.96151e-123	Plasma B
NUDT21	3.90925e-127	0.844199	0.457	0.099	7.68871e-123	Plasma B
VCP	4.4795e-127	1.18752	0.725	0.265	8.81029e-123	Plasma B
PPOX	1.80455e-126	1.03566	0.43	0.087	3.54919e-122	Plasma B
CARS1	2.77982e-126	1.00961	0.412	0.078	5.46735e-122	Plasma B
LOC107034906	1.23505e-125	0.946454	0.554	0.146	2.4291e-121	Plasma B
NDUFA11	3.17947e-125	1.02897	0.692	0.236	6.25338e-121	Plasma B
NDUFA1	1.7442e-124	1.07364	0.681	0.233	3.4305e-120	Plasma B
EMC7	1.27458e-123	0.709237	0.345	0.054	2.50685e-119	Plasma B
IGSF8	3.96534e-123	0.805511	0.386	0.071	7.79903e-119	Plasma B
TMED5	6.17922e-123	0.680865	0.273	0.031	1.21533e-118	Plasma B
TUBB	7.09782e-123	1.02544	0.42	0.087	1.396e-118	Plasma B
SMC1A	1.23961e-122	0.981586	0.32	0.047	2.43807e-118	Plasma B
UBXN4	3.21509e-122	0.9733	0.547	0.148	6.32344e-118	Plasma B
EIF4G1	1.22079e-121	1.03534	0.493	0.12	2.40105e-117	Plasma B
SFT2D2	4.48335e-121	0.872049	0.296	0.04	8.81784e-117	Plasma B
TFG	5.18405e-121	0.795942	0.331	0.051	1.0196e-116	Plasma B
UBE2J1	1.19535e-119	0.821566	0.296	0.04	2.35102e-115	Plasma B
GCN1	2.94582e-119	0.888475	0.379	0.07	5.79383e-115	Plasma B
CNPY2	3.0452e-119	0.815586	0.491	0.118	5.98931e-115	Plasma B
CCNL2	3.60116e-119	1.05921	0.595	0.177	7.08276e-115	Plasma B
APMAP	4.46394e-119	0.904365	0.442	0.098	8.77967e-115	Plasma B
B4GALT3	4.89222e-119	1.12971	0.696	0.239	9.62201e-115	Plasma B
ABCA7	7.38856e-119	1.01932	0.342	0.056	1.45318e-114	Plasma B
MRPL21	8.43991e-119	0.833156	0.393	0.074	1.65996e-114	Plasma B
POLA2	1.40645e-118	0.930751	0.265	0.03	2.7662e-114	Plasma B
PRKCSH	5.59686e-118	0.585667	0.263	0.029	1.10079e-113	Plasma B
LMNB1	7.48712e-118	0.724162	0.277	0.034	1.47257e-113	Plasma B
CYTIP	2.94662e-117	0.678064	0.324	0.05	5.79541e-113	Plasma B
LOC102539776	3.66296e-117	0.838168	0.397	0.076	7.20431e-113	Plasma B
DHFR	6.39822e-117	0.736702	0.288	0.038	1.2584e-112	Plasma B
SRP68	2.98291e-115	0.891205	0.378	0.073	5.86679e-111	Plasma B
SFXN2	3.09014e-115	0.705151	0.26	0.03	6.07768e-111	Plasma B
COPB1	5.27522e-115	0.693611	0.296	0.042	1.03753e-110	Plasma B
EIF5A	2.75019e-114	1.04474	0.72	0.285	5.40907e-110	Plasma B
ITGB7	5.94951e-114	1.14709	0.731	0.279	1.17015e-109	Plasma B
LOC102540022	1.84461e-113	1.08073	0.647	0.233	3.62798e-109	Plasma B
SSBP3	2.47336e-113	0.723096	0.264	0.032	4.8646e-109	Plasma B
CCDC134	3.28571e-113	0.62967	0.252	0.028	6.46233e-109	Plasma B
COPB2	3.99902e-113	0.746082	0.331	0.055	7.86527e-109	Plasma B
SBNO2	1.72969e-112	0.901531	0.306	0.047	3.40196e-108	Plasma B
TSFM	1.76115e-112	0.705901	0.276	0.037	3.46382e-108	Plasma B
AMMECR1L	9.62918e-112	0.92661	0.416	0.091	1.89387e-107	Plasma B
LAPTM4A	3.14546e-111	0.779532	0.45	0.107	6.18649e-107	Plasma B
LOC102534921	4.4533e-111	1.04946	0.634	0.209	8.75875e-107	Plasma B
LOC102531117	1.42758e-110	1.21801	0.291	0.043	2.80776e-106	Plasma B
CPT1A	2.94072e-110	0.936358	0.35	0.065	5.78381e-106	Plasma B
CD46	4.19797e-110	1.08304	0.818	0.405	8.25658e-106	Plasma B
AIFM1	8.17419e-110	0.638506	0.306	0.048	1.6077e-105	Plasma B
LOC102539680	8.4979e-110	1.11505	0.727	0.316	1.67137e-105	Plasma B
YIPF3	1.27642e-109	0.734466	0.454	0.108	2.51046e-105	Plasma B
ATP5F1D	1.83567e-109	0.692237	0.296	0.045	3.61039e-105	Plasma B
LOC102524863	5.31804e-109	0.930879	0.425	0.099	1.04595e-104	Plasma B
POU2AF1	6.20286e-109	1.07086	0.702	0.283	1.21998e-104	Plasma B
SRP14	1.12925e-108	0.936363	0.554	0.167	2.22102e-104	Plasma B
REEP5	2.7595e-108	0.726076	0.41	0.09	5.42738e-104	Plasma B
PPIG	5.51256e-108	1.15881	0.611	0.202	1.08421e-103	Plasma B
ARCN1	6.66289e-108	0.704452	0.263	0.034	1.31046e-103	Plasma B
LOC107035232	6.92903e-108	0.768072	0.39	0.084	1.3628e-103	Plasma B
CBX5	7.62394e-108	0.853465	0.312	0.052	1.49948e-103	Plasma B
MTDH	1.70273e-107	1.08792	0.66	0.245	3.34893e-103	Plasma B
ANKRD28	4.42826e-107	0.881925	0.267	0.036	8.70951e-103	Plasma B
HSD17B1	5.61618e-107	0.588587	0.252	0.03	1.10459e-102	Plasma B
CDK5RAP3	7.53798e-107	0.897881	0.492	0.13	1.48257e-102	Plasma B
UBE2T	1.37418e-106	1.14129	0.41	0.097	2.70274e-102	Plasma B
LOC116279909	3.45546e-106	1.2095	0.43	0.105	6.79621e-102	Plasma B
PTTG1IP	4.51139e-106	0.958698	0.516	0.149	8.873e-102	Plasma B
IMPDH1	2.46864e-105	0.570724	0.263	0.035	4.85531e-101	Plasma B
RUVBL1	3.09058e-105	0.809168	0.366	0.074	6.07856e-101	Plasma B
ESYT1	6.11824e-105	0.875748	0.524	0.151	1.20334e-100	Plasma B
DUT1	6.67687e-105	1.28139	0.69	0.302	1.31321e-100	Plasma B
LOC116276574	9.87298e-105	0.787276	0.267	0.037	1.94182e-100	Plasma B
PSAP	4.20049e-104	1.12102	0.776	0.362	8.26153e-100	Plasma B
GGCX	3.13909e-103	0.84569	0.402	0.09	6.17396e-99	Plasma B
DKC1	3.43216e-103	0.869631	0.412	0.095	6.75038e-99	Plasma B
ANTXR2	8.53595e-103	0.886866	0.261	0.036	1.67885e-98	Plasma B
SPEN	4.66315e-102	0.962447	0.366	0.076	9.17149e-98	Plasma B
MAPKAPK3	5.78561e-102	0.705896	0.257	0.035	1.13791e-97	Plasma B
DSN1	6.19163e-102	0.672659	0.336	0.063	1.21777e-97	Plasma B
LOC102537032	1.71661e-101	0.923542	0.292	0.047	3.37622e-97	Plasma B
LOC102536999	1.986e-101	0.826928	0.597	0.192	3.90606e-97	Plasma B
HMGA1	2.13948e-101	0.716954	0.31	0.055	4.20793e-97	Plasma B
SDHC	3.53667e-101	0.680027	0.391	0.087	6.95592e-97	Plasma B
ERAP2	6.13958e-101	0.530133	0.257	0.035	1.20753e-96	Plasma B
POLR2D	6.62886e-101	0.621793	0.377	0.08	1.30376e-96	Plasma B
GOLGA2	3.24782e-100	0.924472	0.381	0.084	6.38782e-96	Plasma B
ATP2A3	1.08118e-99	0.977602	0.635	0.223	2.12647e-95	Plasma B
LOC107033837	1.07662e-98	0.556331	0.308	0.054	2.1175e-94	Plasma B
EIF3J	2.8845e-98	0.86065	0.464	0.126	5.67323e-94	Plasma B
MYBL2	7.56127e-98	0.757928	0.365	0.079	1.48715e-93	Plasma B
LOC102540062	2.26658e-97	1.02433	0.412	0.101	4.45792e-93	Plasma B
COPA	1.13922e-96	0.589276	0.269	0.042	2.24061e-92	Plasma B
UCHL5	1.20288e-96	0.636503	0.354	0.074	2.36581e-92	Plasma B
TPST1	2.90914e-96	0.592425	0.271	0.042	5.7217e-92	Plasma B
ATP13A21	3.71649e-96	0.928875	0.538	0.168	7.30958e-92	Plasma B
TMEM59	8.15613e-96	0.745297	0.475	0.133	1.60415e-91	Plasma B
ATP2A2	1.18659e-95	0.724905	0.366	0.08	2.33379e-91	Plasma B
ARL6IP1	1.33448e-95	0.909672	0.318	0.062	2.62465e-91	Plasma B
EIF2S2	1.62353e-95	0.90965	0.633	0.233	3.19316e-91	Plasma B
LRPAP1	1.22051e-94	0.681012	0.513	0.152	2.40051e-90	Plasma B
TMEM160	1.48468e-94	0.688128	0.466	0.127	2.92006e-90	Plasma B
ZNF706	4.78471e-94	0.812018	0.599	0.211	9.41056e-90	Plasma B
LOC102543273	4.83634e-94	0.795127	0.381	0.09	9.51212e-90	Plasma B
YIPF2	2.36155e-93	0.757342	0.382	0.089	4.64469e-89	Plasma B
TMX2	5.26557e-93	0.650323	0.367	0.082	1.03563e-88	Plasma B
MARCHF6	7.14218e-93	0.57721	0.304	0.056	1.40472e-88	Plasma B
CSRP1	1.10606e-92	0.638665	0.35	0.075	2.17541e-88	Plasma B
LOC1025309711	1.53808e-92	1.09967	0.765	0.382	3.02509e-88	Plasma B
CRIP11	6.06212e-92	1.14463	0.921	0.655	1.1923e-87	Plasma B
LOC107034595	1.34562e-91	0.778681	0.445	0.121	2.64657e-87	Plasma B
LOC1025405431	1.60511e-91	0.65906	0.511	0.155	3.15694e-87	Plasma B
MRPS25	1.76623e-91	0.603642	0.322	0.064	3.47383e-87	Plasma B
LOC102535382	4.98101e-91	0.677489	0.412	0.106	9.79665e-87	Plasma B
LOC107033593	1.37359e-90	0.590872	0.253	0.039	2.70157e-86	Plasma B
COASY	3.18242e-90	0.680817	0.349	0.078	6.25918e-86	Plasma B
CPSF1	4.35308e-90	0.840288	0.426	0.113	8.56163e-86	Plasma B
CDRT4	1.20568e-89	0.467903	0.276	0.047	2.37134e-85	Plasma B
ALG5	1.24274e-89	0.645298	0.386	0.094	2.44422e-85	Plasma B
ASXL1	8.25075e-89	0.967674	0.347	0.079	1.62276e-84	Plasma B
EIF3A	1.89103e-88	0.924925	0.63	0.243	3.71928e-84	Plasma B
MIA2	5.97019e-88	0.592275	0.287	0.053	1.17422e-83	Plasma B
GMPPA	4.5924e-87	0.760314	0.306	0.062	9.03234e-83	Plasma B
SCFD1	3.0781e-86	0.619965	0.308	0.063	6.054e-82	Plasma B
MRPL20	1.41773e-85	0.748718	0.421	0.117	2.78839e-81	Plasma B
ACP1	2.37062e-85	0.585632	0.385	0.097	4.66254e-81	Plasma B
ATP13A1	3.37835e-85	0.782971	0.366	0.09	6.64455e-81	Plasma B
ANP32B	7.62295e-85	1.18688	0.706	0.358	1.49928e-80	Plasma B
PCBD2	2.07178e-84	0.584029	0.332	0.074	4.07478e-80	Plasma B
GSPT1	2.14392e-84	0.663575	0.286	0.056	4.21665e-80	Plasma B
BNIP3	6.96992e-84	0.683219	0.32	0.071	1.37084e-79	Plasma B
CHPF2	8.28386e-84	0.540481	0.253	0.043	1.62927e-79	Plasma B
ATP5MC1	9.4782e-84	0.803377	0.547	0.193	1.86417e-79	Plasma B
SUPT5H	1.71126e-83	0.828508	0.625	0.235	3.3657e-79	Plasma B
SEC13	4.05676e-83	0.635913	0.308	0.066	7.97883e-79	Plasma B
LGALS3BP	6.83271e-83	0.594928	0.335	0.076	1.34386e-78	Plasma B
TOP3A	8.65287e-83	0.719378	0.416	0.115	1.70185e-78	Plasma B
COMMD3	1.34199e-82	0.577762	0.308	0.066	2.63942e-78	Plasma B
LOC102527945	5.01196e-82	0.747969	0.524	0.177	9.85751e-78	Plasma B
HDGF	5.21016e-82	0.80903	0.501	0.168	1.02473e-77	Plasma B
SEC11A	5.45347e-81	0.638892	0.408	0.114	1.07259e-76	Plasma B
DBF4	9.43811e-81	0.641779	0.287	0.059	1.85629e-76	Plasma B
TMEM161A	1.24826e-80	0.611448	0.291	0.06	2.45507e-76	Plasma B
EIF4A1	1.3183e-80	0.918677	0.685	0.312	2.59284e-76	Plasma B
PTPRCAP	1.34563e-80	0.772682	0.645	0.261	2.64658e-76	Plasma B
REXO2	1.77677e-80	0.565098	0.287	0.059	3.49455e-76	Plasma B
RPA3	4.43673e-80	0.748685	0.598	0.229	8.72617e-76	Plasma B
ACAT2	3.22858e-79	0.637691	0.316	0.072	6.34998e-75	Plasma B
PSMD13	5.09189e-79	0.785097	0.538	0.19	1.00147e-74	Plasma B
FDPS	6.09048e-79	0.735017	0.452	0.139	1.19788e-74	Plasma B
NOC2L	1.10328e-78	0.831595	0.306	0.069	2.16994e-74	Plasma B
PDHB	1.34474e-78	0.514225	0.306	0.068	2.64484e-74	Plasma B
HNRNPA3	2.16155e-78	0.872708	0.757	0.379	4.25134e-74	Plasma B
CITED2	2.36842e-78	0.694682	0.275	0.055	4.6582e-74	Plasma B
ANKRD12	4.31701e-78	1.08877	0.484	0.164	8.4907e-74	Plasma B
ERH	8.29021e-78	0.62612	0.425	0.128	1.63052e-73	Plasma B
PGAM1	1.38747e-77	0.780456	0.495	0.173	2.72889e-73	Plasma B
PHPT1	2.19108e-77	0.646794	0.495	0.161	4.30942e-73	Plasma B
ST6GALNAC6	4.30953e-77	0.605296	0.387	0.105	8.47599e-73	Plasma B
MGAT1	5.66972e-77	0.592648	0.495	0.16	1.11512e-72	Plasma B
LOC102533381	2.06945e-76	0.767994	0.743	0.345	4.0702e-72	Plasma B
RTN3	3.66535e-76	0.547354	0.256	0.049	7.20901e-72	Plasma B
NCAPH2	3.96277e-76	0.6961	0.389	0.107	7.79398e-72	Plasma B
NDUFB11	2.47931e-75	0.609184	0.495	0.165	4.8763e-71	Plasma B
EIF3I	4.44934e-75	0.631865	0.599	0.232	8.75096e-71	Plasma B
ZBTB38	5.66915e-75	0.698804	0.311	0.074	1.11501e-70	Plasma B
FUCA1	7.35953e-75	0.68253	0.265	0.054	1.44747e-70	Plasma B
GPAT4	1.00409e-74	0.599231	0.347	0.089	1.97485e-70	Plasma B
FLNB	1.42977e-74	0.738698	0.269	0.056	2.81208e-70	Plasma B
TAPBP	1.94907e-74	0.685673	0.68	0.29	3.83343e-70	Plasma B
PSMB2	5.52766e-74	0.557995	0.362	0.098	1.08718e-69	Plasma B
LSM3	1.6609e-73	0.508909	0.339	0.086	3.26665e-69	Plasma B
OS9	1.68917e-73	0.694386	0.61	0.243	3.32226e-69	Plasma B
UFM1	4.37061e-73	0.615481	0.548	0.199	8.59611e-69	Plasma B
LRRC8A	5.30477e-73	0.578674	0.253	0.05	1.04334e-68	Plasma B
CKS2	1.21618e-72	0.704289	0.277	0.062	2.39199e-68	Plasma B
PSMD3	2.50257e-72	0.557279	0.358	0.096	4.92205e-68	Plasma B
RBM25	1.78466e-71	0.874709	0.546	0.207	3.51007e-67	Plasma B
HSPD1	4.50696e-71	0.647848	0.354	0.098	8.86428e-67	Plasma B
CDK10	5.03714e-71	0.57735	0.327	0.083	9.90704e-67	Plasma B
MCM7	6.99729e-71	0.652863	0.413	0.127	1.37623e-66	Plasma B
SDF2	1.04241e-70	0.435184	0.259	0.053	2.05022e-66	Plasma B
PRDX1	1.88591e-70	0.898836	0.661	0.323	3.7092e-66	Plasma B
SUB1	1.88925e-70	0.743812	0.769	0.398	3.71578e-66	Plasma B
ACOT13	3.63196e-70	0.49671	0.363	0.102	7.14334e-66	Plasma B
WDR33	7.3128e-70	0.676944	0.306	0.075	1.43828e-65	Plasma B
OGFOD2	1.57751e-69	0.567731	0.28	0.064	3.10264e-65	Plasma B
ALDH16A1	2.35441e-69	0.663666	0.298	0.072	4.63065e-65	Plasma B
RANBP1	4.11884e-69	0.625103	0.357	0.101	8.10094e-65	Plasma B
TRNT1	4.75434e-69	0.638227	0.367	0.106	9.35083e-65	Plasma B
ARL1	4.8463e-69	0.380807	0.257	0.054	9.5317e-65	Plasma B
PSMB7	6.9349e-69	0.615694	0.449	0.15	1.36396e-64	Plasma B
SRP19	1.04652e-68	0.499158	0.505	0.18	2.0583e-64	Plasma B
NARS1	2.46259e-68	0.52506	0.359	0.102	4.84342e-64	Plasma B
ATP1B3	2.61248e-68	0.672724	0.318	0.083	5.13823e-64	Plasma B
LOC102541957	2.96427e-68	0.610304	0.501	0.183	5.83012e-64	Plasma B
PSME2	4.83202e-68	0.696936	0.654	0.296	9.50361e-64	Plasma B
POLR2E	6.83048e-68	0.729538	0.572	0.227	1.34342e-63	Plasma B
CDC16	1.05467e-67	0.639031	0.316	0.082	2.07432e-63	Plasma B
LOC102534579	3.79028e-67	0.843224	0.756	0.439	7.45472e-63	Plasma B
ILF2	7.4568e-67	0.490148	0.347	0.096	1.4666e-62	Plasma B
GNL3	7.86395e-67	0.571797	0.336	0.092	1.54668e-62	Plasma B
GAPDH	8.2164e-67	0.942212	0.767	0.476	1.616e-62	Plasma B
ADGRE5	1.34753e-66	0.693589	0.574	0.228	2.65032e-62	Plasma B
PITPNB	1.68898e-66	0.490112	0.35	0.098	3.32189e-62	Plasma B
BCAP31	1.82055e-66	0.558586	0.534	0.2	3.58066e-62	Plasma B
WDR18	2.04301e-66	0.487315	0.312	0.081	4.0182e-62	Plasma B
NAAA	2.52419e-66	0.48991	0.326	0.088	4.96457e-62	Plasma B
MDH1	2.80742e-66	0.494606	0.398	0.123	5.52163e-62	Plasma B
BSG	3.29442e-66	0.553825	0.444	0.148	6.47947e-62	Plasma B
TM9SF2	1.37453e-65	0.488295	0.434	0.143	2.70343e-61	Plasma B
SRP9	1.87172e-65	0.462507	0.286	0.069	3.6813e-61	Plasma B
CALM3	2.22694e-65	0.646629	0.416	0.138	4.37995e-61	Plasma B
CCT5	2.38119e-65	0.700503	0.544	0.218	4.68332e-61	Plasma B
LOC102528314	3.61196e-65	0.786612	0.283	0.069	7.104e-61	Plasma B
TRIB1	3.82876e-65	0.640151	0.327	0.089	7.5304e-61	Plasma B
RANGAP1	5.40092e-65	0.633043	0.33	0.091	1.06225e-60	Plasma B
GBF1	9.72107e-65	0.545532	0.255	0.056	1.91194e-60	Plasma B
ACSS1	1.61122e-64	0.494937	0.267	0.062	3.16895e-60	Plasma B
CHCHD10	1.7243e-64	0.529516	0.409	0.13	3.39134e-60	Plasma B
RAB1A	5.20693e-64	0.527865	0.276	0.067	1.0241e-59	Plasma B
SPTBN1	8.25042e-64	0.636316	0.386	0.123	1.62269e-59	Plasma B
VSIR	8.77218e-64	0.516061	0.265	0.063	1.72531e-59	Plasma B
NARF	1.53645e-63	0.6889	0.387	0.122	3.02188e-59	Plasma B
LOC107033401	3.00592e-63	0.659335	0.358	0.108	5.91204e-59	Plasma B
EBP	4.49735e-63	0.403664	0.251	0.055	8.84539e-59	Plasma B
NME1	9.07085e-63	0.601972	0.418	0.142	1.78405e-58	Plasma B
CNIH1	1.04705e-62	0.47965	0.314	0.085	2.05934e-58	Plasma B
SEC62	2.29035e-62	0.497145	0.621	0.261	4.50466e-58	Plasma B
ATP5F1A	2.77814e-62	0.748571	0.678	0.333	5.46404e-58	Plasma B
AKR1A1	3.73292e-62	0.494126	0.402	0.131	7.34191e-58	Plasma B
CSE1L	5.47819e-62	0.543953	0.365	0.111	1.07745e-57	Plasma B
RBBP6	9.94126e-62	0.896512	0.484	0.184	1.95525e-57	Plasma B
TUFM	2.56048e-61	0.521609	0.345	0.102	5.03595e-57	Plasma B
INTS11	2.7232e-61	0.491747	0.311	0.084	5.35598e-57	Plasma B
SMAP1	2.92306e-61	0.391315	0.327	0.092	5.74907e-57	Plasma B
ABCF1	9.82173e-61	0.52914	0.422	0.143	1.93174e-56	Plasma B
PSMA5	1.01123e-60	0.423881	0.282	0.071	1.98889e-56	Plasma B
MPC2	1.48444e-60	0.504267	0.503	0.19	2.91959e-56	Plasma B
NOP58	1.99215e-60	0.821692	0.559	0.239	3.91815e-56	Plasma B
HADHA	2.16688e-60	0.617887	0.358	0.111	4.26183e-56	Plasma B
MRPS18B	2.49181e-60	0.486266	0.448	0.157	4.90089e-56	Plasma B
SYVN1	3.40472e-60	0.793204	0.637	0.284	6.6964e-56	Plasma B
UPF1	3.48223e-60	0.721746	0.457	0.169	6.84884e-56	Plasma B
SACM1L	3.53618e-60	0.581014	0.271	0.067	6.95495e-56	Plasma B
PPP1R2	1.0007e-59	0.408338	0.315	0.088	1.96818e-55	Plasma B
SCRIB	1.16944e-59	0.708529	0.349	0.108	2.30004e-55	Plasma B
PPM1G	1.26261e-59	0.512402	0.363	0.115	2.4833e-55	Plasma B
PIM2	1.33913e-59	0.554315	0.354	0.108	2.6338e-55	Plasma B
INTS1	3.43155e-59	0.663031	0.261	0.065	6.74917e-55	Plasma B
XRCC1	3.48092e-59	0.571558	0.26	0.064	6.84627e-55	Plasma B
SRSF11	4.15584e-59	0.864403	0.83	0.47	8.17371e-55	Plasma B
BAZ1B	4.85701e-59	0.615192	0.363	0.116	9.55276e-55	Plasma B
BTK1	1.1921e-58	0.543209	0.471	0.173	2.34463e-54	Plasma B
DNAJC5	2.26685e-58	0.397025	0.287	0.075	4.45845e-54	Plasma B
MRPL12	6.35678e-58	0.504924	0.369	0.118	1.25025e-53	Plasma B
LOC102529630	1.8813e-57	0.608754	0.668	0.324	3.70014e-53	Plasma B
LOC102533977	2.11738e-57	0.566644	0.45	0.166	4.16447e-53	Plasma B
SLC20A11	2.91799e-57	0.604342	0.334	0.103	5.73911e-53	Plasma B
PSMB6	3.15298e-57	0.58003	0.462	0.174	6.20129e-53	Plasma B
SLC25A3	5.16169e-57	0.60148	0.686	0.339	1.0152e-52	Plasma B
RFC4	2.1913e-56	0.420516	0.255	0.063	4.30986e-52	Plasma B
STX5	3.03969e-56	0.406709	0.295	0.082	5.97845e-52	Plasma B
LOC102541006	3.57067e-56	0.423553	0.409	0.141	7.0228e-52	Plasma B
NDUFB7	3.84628e-56	0.581903	0.448	0.165	7.56486e-52	Plasma B
SLC52A2	4.50759e-56	0.499903	0.433	0.154	8.86553e-52	Plasma B
ACSF2	5.54259e-56	0.490496	0.334	0.103	1.09012e-51	Plasma B
ARID5B	5.55341e-56	0.573727	0.275	0.073	1.09225e-51	Plasma B
CMC2	5.96638e-56	0.429663	0.279	0.075	1.17347e-51	Plasma B
HDAC7	1.05684e-55	0.580744	0.548	0.224	2.07859e-51	Plasma B
MPDU1	1.89223e-55	0.395138	0.312	0.091	3.72163e-51	Plasma B
AK2	1.91474e-55	0.411336	0.291	0.081	3.76591e-51	Plasma B
DDX46	1.93439e-55	0.649622	0.442	0.167	3.80456e-51	Plasma B
HAX1	5.48539e-55	0.366839	0.286	0.079	1.07887e-50	Plasma B
CNOT1	6.6699e-55	0.567809	0.311	0.092	1.31184e-50	Plasma B
TPM4	7.34297e-55	0.539979	0.323	0.1	1.44422e-50	Plasma B
VPREB1	9.86706e-55	0.578609	0.614	0.278	1.94065e-50	Plasma B
MRPS34	1.15516e-54	0.46675	0.42	0.15	2.27197e-50	Plasma B
CBX4	1.47558e-54	0.611989	0.298	0.087	2.90217e-50	Plasma B
SORL1	1.54958e-54	0.395731	0.261	0.068	3.04772e-50	Plasma B
LAIR1	2.17201e-54	0.475473	0.39	0.132	4.27191e-50	Plasma B
XRN2	5.16048e-54	0.488741	0.255	0.066	1.01496e-49	Plasma B
LEPROTL1	5.49013e-54	0.395729	0.426	0.153	1.0798e-49	Plasma B
RPLP0	6.41559e-54	0.453855	0.971	0.946	1.26182e-49	Plasma B
MRTO4	6.51096e-54	0.392535	0.261	0.068	1.28058e-49	Plasma B
EIF1AX	9.88937e-54	0.509668	0.426	0.16	1.94504e-49	Plasma B
LOC107034428	9.94369e-54	0.663992	0.755	0.416	1.95572e-49	Plasma B
SERINC1	1.00108e-53	0.388316	0.3	0.087	1.96893e-49	Plasma B
NDUFA10	1.12091e-53	0.449831	0.275	0.076	2.2046e-49	Plasma B
SYNCRIP	1.21958e-53	0.466025	0.338	0.108	2.39867e-49	Plasma B
BOLA2B	1.85725e-53	0.458137	0.334	0.105	3.65284e-49	Plasma B
LOC116279034	2.64635e-53	0.412309	0.314	0.094	5.20485e-49	Plasma B
PIGO	3.57528e-53	0.505965	0.383	0.132	7.03187e-49	Plasma B
ATP6AP1	4.40184e-53	0.383915	0.259	0.068	8.65754e-49	Plasma B
YKT6	6.078e-53	0.426133	0.302	0.09	1.19542e-48	Plasma B
HTRA2	8.60401e-53	0.490378	0.373	0.128	1.69224e-48	Plasma B
GAR1	1.98883e-52	0.520543	0.286	0.083	3.91163e-48	Plasma B
B4GALT7	2.13976e-52	0.381599	0.256	0.068	4.20849e-48	Plasma B
LOC102543442	8.16688e-52	0.361677	0.34	0.11	1.60626e-47	Plasma B
ATP5MC3	1.08639e-51	0.649634	0.657	0.339	2.1367e-47	Plasma B
APPL1	1.19937e-51	0.383378	0.257	0.068	2.35892e-47	Plasma B
KLHDC3	1.64896e-51	0.398932	0.424	0.156	3.24317e-47	Plasma B
TRABD	1.75313e-51	0.623082	0.607	0.281	3.44805e-47	Plasma B
DGCR8	2.36567e-51	0.597197	0.257	0.07	4.6528e-47	Plasma B
WDR83OS	2.52708e-51	0.331217	0.472	0.184	4.97026e-47	Plasma B
DDX21	2.61966e-51	0.511205	0.282	0.082	5.15234e-47	Plasma B
LOC1025400121	2.68743e-51	0.396096	0.445	0.168	5.28565e-47	Plasma B
NDUFA7	4.16259e-51	0.454209	0.517	0.214	8.18699e-47	Plasma B
EWSR1	4.24703e-51	0.587256	0.59	0.267	8.35306e-47	Plasma B
OGT	5.87489e-51	0.811217	0.736	0.388	1.15547e-46	Plasma B
EIF3B	5.92179e-51	0.661215	0.43	0.167	1.1647e-46	Plasma B
FANCA	9.27557e-51	0.724171	0.346	0.117	1.82432e-46	Plasma B
VAV1	1.15012e-50	0.566376	0.5	0.208	2.26206e-46	Plasma B
SPOP	1.41309e-50	0.516081	0.291	0.088	2.77926e-46	Plasma B
GRK5	1.78518e-50	0.538437	0.403	0.15	3.5111e-46	Plasma B
KLF3	3.0279e-50	0.591278	0.328	0.109	5.95528e-46	Plasma B
SUZ12	8.37813e-50	0.422394	0.261	0.074	1.64781e-45	Plasma B
IMMT	9.82926e-50	0.517429	0.264	0.075	1.93322e-45	Plasma B
SRSF10	1.0324e-49	0.633729	0.622	0.306	2.03052e-45	Plasma B
PA2G4	2.73307e-49	0.558405	0.426	0.172	5.37541e-45	Plasma B
OST4	3.20709e-49	0.440117	0.512	0.217	6.3077e-45	Plasma B
CUNH5orf24	3.64879e-49	0.529562	0.375	0.137	7.17643e-45	Plasma B
DNAJC2	3.78653e-49	0.533621	0.315	0.102	7.44735e-45	Plasma B
SF3B3	4.88408e-49	0.429763	0.253	0.07	9.60601e-45	Plasma B
LOC102532857	5.05828e-49	0.478846	0.355	0.122	9.94862e-45	Plasma B
CD48	9.23902e-49	0.483173	0.633	0.305	1.81713e-44	Plasma B
ZC3H7A	9.50006e-49	0.569794	0.402	0.152	1.86847e-44	Plasma B
ATP5MC21	1.27092e-48	0.565874	0.777	0.469	2.49965e-44	Plasma B
NAXE	2.74553e-48	0.391639	0.256	0.072	5.39991e-44	Plasma B
PSMB1	2.90228e-48	0.520552	0.665	0.333	5.7082e-44	Plasma B
MRPL27	3.07903e-48	0.37387	0.28	0.084	6.05583e-44	Plasma B
RABGAP1L	8.0943e-48	0.593852	0.365	0.131	1.59199e-43	Plasma B
ZRANB2	9.63489e-48	0.494133	0.554	0.245	1.89499e-43	Plasma B
UBA1	1.51291e-47	0.359349	0.349	0.121	2.97559e-43	Plasma B
NDUFS8	1.6969e-47	0.467611	0.395	0.15	3.33746e-43	Plasma B
SEM1	2.37973e-47	0.473444	0.558	0.253	4.68046e-43	Plasma B
LRP10	3.72301e-47	0.409318	0.464	0.186	7.32241e-43	Plasma B
TCIRG1	5.44911e-47	0.474052	0.263	0.078	1.07173e-42	Plasma B
SAMM50	6.63105e-47	0.418577	0.347	0.121	1.3042e-42	Plasma B
PBDC1	8.35629e-47	0.382633	0.417	0.161	1.64352e-42	Plasma B
MICOS10	1.36154e-46	0.381564	0.536	0.239	2.67787e-42	Plasma B
TKT	1.48033e-46	0.416351	0.315	0.105	2.9115e-42	Plasma B
FH	1.77622e-46	0.356699	0.264	0.078	3.49348e-42	Plasma B
EIF2S1	2.32984e-46	0.342962	0.259	0.075	4.58233e-42	Plasma B
GLCCI1	4.00052e-46	0.517392	0.287	0.092	7.86821e-42	Plasma B
VMA21	9.3159e-46	0.318766	0.339	0.118	1.83225e-41	Plasma B
PSMA2	1.43146e-45	0.487019	0.574	0.276	2.81539e-41	Plasma B
CCT3	1.69363e-45	0.473632	0.425	0.171	3.33104e-41	Plasma B
YWHAE	2.29409e-45	0.464809	0.563	0.262	4.51202e-41	Plasma B
NDUFV1	3.61512e-45	0.400659	0.377	0.14	7.11022e-41	Plasma B
SNRPF	5.66567e-45	0.441524	0.554	0.256	1.11432e-40	Plasma B
STRAP	6.35006e-45	0.461641	0.251	0.073	1.24893e-40	Plasma B
CCT7	6.8251e-45	0.405708	0.466	0.191	1.34236e-40	Plasma B
NDE1	1.13643e-44	0.320069	0.257	0.076	2.23514e-40	Plasma B
LOC102531964	1.17329e-44	0.383956	0.403	0.159	2.30762e-40	Plasma B
ST6GAL1	3.59597e-44	0.404158	0.277	0.087	7.07256e-40	Plasma B
PSMC2	4.55284e-44	0.372829	0.338	0.12	8.95452e-40	Plasma B
CCT8	5.15399e-44	0.478568	0.412	0.167	1.01369e-39	Plasma B
PUS1	5.33741e-44	0.384334	0.287	0.092	1.04976e-39	Plasma B
GHITM	8.32992e-44	0.319223	0.314	0.107	1.63833e-39	Plasma B
ZFAND2A	8.48892e-44	0.345149	0.298	0.098	1.6696e-39	Plasma B
LRMP	1.02146e-43	0.474004	0.251	0.075	2.009e-39	Plasma B
CTSA	1.14189e-43	0.405732	0.434	0.177	2.24587e-39	Plasma B
TCF25	1.40236e-43	0.549451	0.696	0.363	2.75817e-39	Plasma B
NDUFB6	1.54094e-43	0.389406	0.456	0.194	3.03071e-39	Plasma B
RPS6KB2	1.80266e-43	0.50326	0.272	0.087	3.54546e-39	Plasma B
RPS28	2.36076e-43	0.385763	0.977	0.974	4.64313e-39	Plasma B
C1QBP	3.33936e-43	0.402079	0.343	0.126	6.56785e-39	Plasma B
PSMD4	4.3842e-43	0.3614	0.434	0.176	8.62285e-39	Plasma B
LSM6	4.55447e-43	0.277937	0.316	0.109	8.95773e-39	Plasma B
NDUFB9	5.02871e-43	0.312081	0.43	0.174	9.89047e-39	Plasma B
RBBP7	5.37704e-43	0.363509	0.488	0.211	1.05756e-38	Plasma B
IMP4	6.74959e-43	0.352011	0.382	0.145	1.32751e-38	Plasma B
RAB8A	7.06883e-43	0.380651	0.28	0.091	1.3903e-38	Plasma B
ARF1	1.01937e-42	0.366575	0.559	0.255	2.00489e-38	Plasma B
SMARCA4	1.13176e-42	0.538749	0.586	0.285	2.22595e-38	Plasma B
PSMA6	1.22541e-42	0.367402	0.5	0.223	2.41013e-38	Plasma B
PAXX	1.80056e-42	0.338794	0.418	0.165	3.54135e-38	Plasma B
LOC107033710	1.99068e-42	0.337117	0.574	0.268	3.91527e-38	Plasma B
LOC102525779	2.66557e-42	0.410256	0.261	0.082	5.24265e-38	Plasma B
NAGK	2.75678e-42	0.407244	0.296	0.1	5.42204e-38	Plasma B
NPLOC4	2.89933e-42	0.401072	0.28	0.092	5.7024e-38	Plasma B
PIN4	3.17606e-42	0.257142	0.353	0.13	6.24667e-38	Plasma B
ZNF292	3.26206e-42	0.58213	0.282	0.094	6.41583e-38	Plasma B
PHB2	5.79773e-42	0.345276	0.385	0.149	1.1403e-37	Plasma B
VPS16	6.10627e-42	0.521094	0.334	0.122	1.20098e-37	Plasma B
TIMM13	6.99181e-42	0.358345	0.432	0.179	1.37515e-37	Plasma B
PTGES3	8.21504e-42	0.411719	0.434	0.182	1.61573e-37	Plasma B
SNRPD3	9.51696e-42	0.389461	0.52	0.241	1.8718e-37	Plasma B
SREK1	1.04172e-41	0.736627	0.395	0.163	2.04886e-37	Plasma B
PSMD7	1.09757e-41	0.461933	0.323	0.117	2.1587e-37	Plasma B
NADK1	1.14811e-41	0.364281	0.383	0.149	2.2581e-37	Plasma B
PLP21	1.45016e-41	0.37695	0.438	0.183	2.85217e-37	Plasma B
NDUFS6	1.52628e-41	0.348694	0.369	0.142	3.00189e-37	Plasma B
PGK1	1.53503e-41	0.424049	0.559	0.267	3.0191e-37	Plasma B
MRPL3	1.67758e-41	0.451888	0.359	0.141	3.29946e-37	Plasma B
DPM3	1.86154e-41	0.302065	0.316	0.111	3.66129e-37	Plasma B
ACTB	3.98113e-41	0.641706	0.735	0.423	7.83009e-37	Plasma B
MRPL40	4.08828e-41	0.327634	0.456	0.193	8.04082e-37	Plasma B
PRKD2	4.51468e-41	0.430328	0.316	0.113	8.87948e-37	Plasma B
SKIV2L	4.65072e-41	0.469822	0.288	0.097	9.14703e-37	Plasma B
MRPL23	6.27622e-41	0.495902	0.468	0.205	1.23441e-36	Plasma B
COPE	9.17347e-41	0.257485	0.381	0.148	1.80424e-36	Plasma B
ENO1	1.0997e-40	0.59188	0.689	0.399	2.1629e-36	Plasma B
POLD1	1.35937e-40	0.498151	0.263	0.085	2.67361e-36	Plasma B
EIF3L	1.41719e-40	0.351759	0.428	0.179	2.78732e-36	Plasma B
PSMA1	1.675e-40	0.323165	0.391	0.156	3.29439e-36	Plasma B
NDUFV3	1.72201e-40	0.336402	0.37	0.144	3.38684e-36	Plasma B
TMX1	2.19929e-40	0.284759	0.26	0.083	4.32556e-36	Plasma B
PTPA	2.21245e-40	0.335493	0.265	0.086	4.35145e-36	Plasma B
BUD23	2.33625e-40	0.344084	0.428	0.178	4.59493e-36	Plasma B
AHSA1	2.95532e-40	0.32517	0.291	0.099	5.81253e-36	Plasma B
LOC102526593	2.98579e-40	0.310431	0.32	0.115	5.87244e-36	Plasma B
ZNF207	4.68772e-40	0.344215	0.269	0.089	9.21981e-36	Plasma B
RAD50	6.25609e-40	0.357243	0.354	0.137	1.23045e-35	Plasma B
ATP5F1C	6.59033e-40	0.444391	0.601	0.304	1.29619e-35	Plasma B
CUNH17orf49	8.55995e-40	0.286341	0.265	0.086	1.68357e-35	Plasma B
LOC102531471	1.00843e-39	0.407934	0.371	0.147	1.98337e-35	Plasma B
PHIP	1.20617e-39	0.725857	0.308	0.113	2.3723e-35	Plasma B
MICOS13	1.4106e-39	0.319945	0.366	0.141	2.77437e-35	Plasma B
IER3IP1	1.7426e-39	0.267727	0.275	0.092	3.42735e-35	Plasma B
WDR61	1.97642e-39	0.30696	0.303	0.107	3.88723e-35	Plasma B
ATP5PD	2.19638e-39	0.330736	0.417	0.176	4.31985e-35	Plasma B
MPST	3.10846e-39	0.333678	0.345	0.131	6.11372e-35	Plasma B
CDV3	3.13963e-39	0.258869	0.555	0.257	6.17502e-35	Plasma B
SNX5	4.45079e-39	0.366244	0.331	0.124	8.75381e-35	Plasma B
LOC116278795	6.50352e-39	0.635763	0.846	0.732	1.27911e-34	Plasma B
ODC1	6.96947e-39	0.329023	0.393	0.159	1.37076e-34	Plasma B
NOP10	8.58492e-39	0.342221	0.369	0.146	1.68848e-34	Plasma B
ATP5F1B	9.03845e-39	0.505443	0.651	0.357	1.77768e-34	Plasma B
PLCL2	9.47084e-39	0.437156	0.374	0.15	1.86273e-34	Plasma B
MDM2	9.58839e-39	0.432266	0.272	0.092	1.88585e-34	Plasma B
NDUFA4	1.29968e-38	0.56151	0.731	0.473	2.55621e-34	Plasma B
CYHR1	1.94593e-38	0.385773	0.255	0.084	3.82725e-34	Plasma B
NOP14	2.27399e-38	0.474757	0.279	0.096	4.47248e-34	Plasma B
RER1	2.47175e-38	0.365454	0.523	0.245	4.86144e-34	Plasma B
LGALS11	3.43713e-38	0.68667	0.417	0.187	6.76015e-34	Plasma B
ALG1	3.51486e-38	0.349322	0.304	0.11	6.91302e-34	Plasma B
DAZAP1	3.86767e-38	0.386834	0.418	0.178	7.60694e-34	Plasma B
TRPV2	5.14108e-38	0.387207	0.336	0.128	1.01115e-33	Plasma B
MAN2B1	6.01247e-38	0.285312	0.391	0.161	1.18253e-33	Plasma B
PSENEN	8.73041e-38	0.300437	0.507	0.233	1.7171e-33	Plasma B
DDX39A	1.08283e-37	0.439808	0.395	0.167	2.12971e-33	Plasma B
TCERG1	1.13216e-37	0.469341	0.302	0.111	2.22673e-33	Plasma B
RHOH	1.33567e-37	0.494349	0.292	0.105	2.627e-33	Plasma B
LOC102530766	1.47011e-37	0.334512	0.56	0.275	2.89141e-33	Plasma B
PPIL2	1.88468e-37	0.494361	0.303	0.112	3.70679e-33	Plasma B
ZC3H11A	2.1707e-37	0.366666	0.312	0.117	4.26932e-33	Plasma B
PTBP1	2.42204e-37	0.486285	0.452	0.205	4.76367e-33	Plasma B
PYGB	3.26703e-37	0.662424	0.308	0.119	6.4256e-33	Plasma B
NDUFA5	3.61034e-37	0.328267	0.402	0.169	7.10081e-33	Plasma B
PABPC4	8.18097e-37	0.347277	0.252	0.085	1.60903e-32	Plasma B
PGAM5	1.23766e-36	0.352098	0.42	0.182	2.43424e-32	Plasma B
LOC116277572	1.59529e-36	0.280616	0.34	0.133	3.13761e-32	Plasma B
CUNH7orf50	2.66542e-36	0.273424	0.39	0.162	5.24235e-32	Plasma B
PSMB5	3.82737e-36	0.308255	0.295	0.107	7.52766e-32	Plasma B
TMEM230	3.92318e-36	0.364284	0.275	0.098	7.71611e-32	Plasma B
LOC1025285751	4.4317e-36	0.774296	0.449	0.205	8.71627e-32	Plasma B
RPL4	7.08171e-36	0.36081	0.964	0.906	1.39283e-31	Plasma B
HAUS5	7.75682e-36	0.376654	0.322	0.125	1.52561e-31	Plasma B
RPP21	9.39299e-36	0.258751	0.363	0.147	1.84741e-31	Plasma B
BUB3	9.5702e-36	0.301121	0.284	0.103	1.88227e-31	Plasma B
FKBP4	1.03651e-35	0.311639	0.307	0.117	2.03862e-31	Plasma B
CHID1	1.14793e-35	0.283162	0.461	0.206	2.25776e-31	Plasma B
ATP6V0C	1.33553e-35	0.385355	0.67	0.368	2.62673e-31	Plasma B
PGP	1.41531e-35	0.309767	0.303	0.115	2.78364e-31	Plasma B
PSMC3	1.64478e-35	0.339538	0.387	0.162	3.23495e-31	Plasma B
TPRA1	1.92258e-35	0.495821	0.299	0.114	3.78132e-31	Plasma B
LOC102533898	2.14195e-35	0.346915	0.399	0.172	4.2128e-31	Plasma B
TCP1	3.24452e-35	0.299082	0.319	0.123	6.38132e-31	Plasma B
EIF4H	3.35509e-35	0.29289	0.441	0.198	6.5988e-31	Plasma B
UFC1	3.50168e-35	0.364711	0.466	0.215	6.8871e-31	Plasma B
IQGAP1	3.733e-35	0.330316	0.284	0.105	7.34205e-31	Plasma B
TIAL1	3.75137e-35	0.321462	0.442	0.197	7.3782e-31	Plasma B
EIF4B	7.73386e-35	0.316722	0.473	0.218	1.5211e-30	Plasma B
ALKBH7	7.75464e-35	0.264847	0.295	0.11	1.52518e-30	Plasma B
SMC3	8.63002e-35	0.418765	0.259	0.091	1.69735e-30	Plasma B
PSMA3	9.04703e-35	0.363769	0.488	0.236	1.77937e-30	Plasma B
ACADVL	9.21889e-35	0.344664	0.46	0.211	1.81317e-30	Plasma B
FAM120A	9.95166e-35	0.355282	0.314	0.122	1.95729e-30	Plasma B
RAP1A1	1.02525e-34	0.310579	0.517	0.248	2.01647e-30	Plasma B
METTL91	1.61087e-34	0.372331	0.645	0.346	3.16825e-30	Plasma B
ITM2C	2.55566e-34	0.294779	0.394	0.17	5.02647e-30	Plasma B
ARFGAP1	3.17527e-34	0.3575	0.369	0.154	6.24512e-30	Plasma B
AIMP2	3.90797e-34	0.316937	0.284	0.106	7.68619e-30	Plasma B
SERINC3	4.4777e-34	0.333754	0.279	0.103	8.80673e-30	Plasma B
PRDX3	4.59279e-34	0.252854	0.26	0.092	9.0331e-30	Plasma B
PSMA4	5.32491e-34	0.359309	0.383	0.163	1.0473e-29	Plasma B
UBAP2L	6.82335e-34	0.41914	0.302	0.116	1.34202e-29	Plasma B
TOMM7	8.39789e-34	0.283657	0.65	0.349	1.6517e-29	Plasma B
SEC16A	9.00902e-34	0.346341	0.292	0.111	1.77189e-29	Plasma B
RAB2A	9.31829e-34	0.292358	0.441	0.205	1.83272e-29	Plasma B
LOC102538808	1.2492e-33	0.493934	0.747	0.483	2.45693e-29	Plasma B
SNRPD1	1.44053e-33	0.28832	0.385	0.166	2.83324e-29	Plasma B
ECHS1	2.32643e-33	0.370727	0.615	0.328	4.57562e-29	Plasma B
PUM2	1.06763e-32	0.336907	0.299	0.117	2.09981e-28	Plasma B
TTLL12	1.14502e-32	0.49052	0.428	0.199	2.25202e-28	Plasma B
TBCD	1.78835e-32	0.578196	0.269	0.103	3.51733e-28	Plasma B
NDUFAB1	2.06156e-32	0.262709	0.409	0.184	4.05468e-28	Plasma B
SDHA	2.41552e-32	0.317895	0.318	0.127	4.75085e-28	Plasma B
EDF11	2.62306e-32	0.379128	0.605	0.318	5.15904e-28	Plasma B
RAB10	2.78891e-32	0.287756	0.294	0.113	5.48523e-28	Plasma B
TMEM18	2.89104e-32	0.304954	0.316	0.128	5.68609e-28	Plasma B
UBE2J2	3.92734e-32	0.288684	0.284	0.109	7.72429e-28	Plasma B
PPP1CA	4.80306e-32	0.29173	0.381	0.167	9.44665e-28	Plasma B
WRNIP1	5.73965e-32	0.251123	0.263	0.097	1.12887e-27	Plasma B
VPREB3	6.95357e-32	0.522397	0.501	0.256	1.36763e-27	Plasma B
CCPG1	8.3905e-32	0.341759	0.255	0.093	1.65024e-27	Plasma B
CD531	9.52289e-32	0.318336	0.477	0.231	1.87296e-27	Plasma B
ANAPC11	9.73149e-32	0.3618	0.611	0.328	1.91399e-27	Plasma B
LOC102539436	1.08638e-31	0.397534	0.902	0.753	2.13669e-27	Plasma B
ATP5PF	1.19944e-31	0.362801	0.654	0.374	2.35905e-27	Plasma B
PHF20L1	1.385e-31	0.257573	0.257	0.094	2.72401e-27	Plasma B
BRAT1	1.40567e-31	0.403452	0.312	0.128	2.76468e-27	Plasma B
PARP1	1.67655e-31	0.272442	0.284	0.111	3.29743e-27	Plasma B
PXMP2	1.70385e-31	0.355367	0.284	0.111	3.35114e-27	Plasma B
RABGGTB	1.86573e-31	0.378086	0.468	0.227	3.66952e-27	Plasma B
CCAR1	2.2832e-31	0.379344	0.393	0.179	4.49059e-27	Plasma B
AARSD1	3.16772e-31	0.330693	0.33	0.138	6.23027e-27	Plasma B
HSPA9	2.63897e-30	0.319378	0.408	0.19	5.19032e-26	Plasma B
PFKL	2.74633e-30	0.390878	0.28	0.11	5.40148e-26	Plasma B
RAD21	2.75225e-30	0.284327	0.31	0.128	5.41312e-26	Plasma B
NDUFA131	8.98927e-30	0.280257	0.609	0.327	1.76801e-25	Plasma B
ATP6V0B	8.99509e-30	0.277262	0.499	0.245	1.76915e-25	Plasma B
HMGB1	1.06806e-29	0.552029	0.835	0.656	2.10065e-25	Plasma B
UBTF	2.34069e-29	0.31939	0.273	0.108	4.60366e-25	Plasma B
PSMC5	3.52697e-29	0.34794	0.402	0.189	6.93683e-25	Plasma B
PRDX51	3.65899e-29	0.292913	0.605	0.332	7.19651e-25	Plasma B
NONO	4.41755e-29	0.259932	0.519	0.261	8.68844e-25	Plasma B
GLRX3	4.64908e-29	0.270606	0.398	0.184	9.14381e-25	Plasma B
SH3GLB21	6.96155e-29	0.494664	0.567	0.306	1.3692e-24	Plasma B
ZFP91	9.29369e-29	0.414592	0.315	0.134	1.82788e-24	Plasma B
DDX27	1.28962e-28	0.350972	0.288	0.118	2.53643e-24	Plasma B
LOC102531857	1.59468e-28	0.315004	0.39	0.175	3.13641e-24	Plasma B
TEX261	2.09287e-28	0.275708	0.272	0.108	4.11626e-24	Plasma B
TUBGCP6	2.14064e-28	0.503421	0.299	0.128	4.21021e-24	Plasma B
PRPF6	3.2779e-28	0.305925	0.389	0.18	6.44698e-24	Plasma B
ALG12	4.1511e-28	0.537418	0.42	0.202	8.16438e-24	Plasma B
ARHGEF6	4.84362e-28	0.283527	0.282	0.114	9.52644e-24	Plasma B
LOC102538356	9.37457e-28	0.352331	0.251	0.098	1.84379e-23	Plasma B
LRRC37A	1.02067e-27	0.256311	0.257	0.101	2.00746e-23	Plasma B
HTT	1.02463e-27	0.296949	0.252	0.099	2.01525e-23	Plasma B
RNF149	1.58348e-27	0.276547	0.385	0.182	3.11439e-23	Plasma B
RBM23	1.58602e-27	0.384444	0.43	0.213	3.11939e-23	Plasma B
KDM5C	1.80156e-27	0.403993	0.277	0.114	3.54331e-23	Plasma B
PPP4R3B	2.67224e-27	0.337184	0.256	0.103	5.25577e-23	Plasma B
RALGPS21	3.83142e-27	0.250407	0.359	0.167	7.53564e-23	Plasma B
IMPDH2	1.97698e-26	0.367474	0.37	0.175	3.88833e-22	Plasma B
PSMB4	2.00385e-26	0.29454	0.649	0.37	3.94117e-22	Plasma B
EXOC3	2.49699e-26	0.326403	0.353	0.162	4.91107e-22	Plasma B
PRPF38B	3.92925e-26	0.428678	0.562	0.312	7.72805e-22	Plasma B
SPTAN1	4.39521e-26	0.315492	0.306	0.134	8.64449e-22	Plasma B
PNKP	5.75886e-26	0.267139	0.33	0.148	1.13265e-21	Plasma B
FLII	6.93465e-26	0.378744	0.339	0.157	1.36391e-21	Plasma B
RBM26	8.17472e-26	0.262777	0.272	0.113	1.6078e-21	Plasma B
DYNC1H1	1.35794e-25	0.255644	0.328	0.149	2.6708e-21	Plasma B
PEBP1	3.31139e-25	0.318533	0.677	0.42	6.51284e-21	Plasma B
LOC116282970	3.53815e-25	0.317928	0.424	0.214	6.95883e-21	Plasma B
NELFB	3.86869e-25	0.327762	0.464	0.24	7.60894e-21	Plasma B
WDR43	5.1909e-25	0.2676	0.272	0.117	1.02095e-20	Plasma B
SRRT	5.74482e-25	0.273607	0.342	0.159	1.12989e-20	Plasma B
TCF41	6.99145e-25	0.273444	0.487	0.257	1.37508e-20	Plasma B
TRIM28	1.74313e-24	0.349495	0.292	0.129	3.42839e-20	Plasma B
PABPC1	2.29386e-24	0.393506	0.81	0.546	4.51156e-20	Plasma B
GPBP1	2.64507e-24	0.257548	0.342	0.159	5.20232e-20	Plasma B
PLEKHM2	5.70792e-24	0.370913	0.273	0.119	1.12263e-19	Plasma B
USP7	1.14463e-23	0.31967	0.403	0.201	2.25127e-19	Plasma B
KDM5A	1.26319e-23	0.359059	0.35	0.169	2.48445e-19	Plasma B
RTEL1	1.36584e-23	0.385915	0.296	0.134	2.68633e-19	Plasma B
ATP5F1E	4.07281e-23	0.351441	0.769	0.53	8.0104e-19	Plasma B
DDB1	4.1752e-23	0.278259	0.346	0.167	8.21178e-19	Plasma B
CCAR2	4.79762e-23	0.363348	0.271	0.119	9.43596e-19	Plasma B
UBL5	6.45778e-23	0.348419	0.771	0.549	1.27012e-18	Plasma B
ATP5PB	8.40455e-22	0.286538	0.661	0.406	1.65301e-17	Plasma B
LRRC45	8.67492e-22	0.352554	0.389	0.199	1.70618e-17	Plasma B
TRIT1	9.42465e-22	0.389371	0.335	0.165	1.85364e-17	Plasma B
GAK	2.55758e-21	0.2735	0.255	0.113	5.03025e-17	Plasma B
SRSF4	2.91893e-21	0.296709	0.319	0.154	5.74095e-17	Plasma B
RPS26	3.46309e-21	0.262	0.956	0.921	6.8112e-17	Plasma B
HUWE1	1.23162e-20	0.277781	0.294	0.139	2.42236e-16	Plasma B
GPCPD1	1.46611e-20	0.34187	0.515	0.292	2.88355e-16	Plasma B
NCL	1.97389e-20	0.329178	0.63	0.407	3.88224e-16	Plasma B
PAN2	2.47685e-20	0.261529	0.261	0.12	4.87147e-16	Plasma B
PRRC2A	3.69429e-20	0.328524	0.272	0.128	7.26593e-16	Plasma B
RBM10	7.42227e-20	0.270633	0.318	0.158	1.45981e-15	Plasma B
LOC102525188	8.76854e-20	0.447763	0.806	0.757	1.7246e-15	Plasma B
SLC25A61	1.22951e-19	0.338104	0.846	0.672	2.4182e-15	Plasma B
CXXC1	3.27113e-19	0.264543	0.257	0.121	6.43367e-15	Plasma B
LOC102542090	3.24072e-18	0.301784	0.866	0.775	6.37385e-14	Plasma B
HMGB2	6.79896e-18	0.867496	0.775	0.672	1.33722e-13	Plasma B
ENTPD6	2.26339e-17	0.414973	0.617	0.386	4.45163e-13	Plasma B
NOP56	4.06618e-16	0.315486	0.567	0.357	7.99737e-12	Plasma B
NUCKS1	1.70512e-15	0.288066	0.496	0.31	3.35362e-11	Plasma B
RPS2	1.71938e-15	0.391692	0.938	0.957	3.38168e-11	Plasma B
EEF2	1.76346e-15	0.284049	0.91	0.755	3.46837e-11	Plasma B
HMGN2	3.69887e-14	0.362792	0.706	0.545	7.27494e-10	Plasma B
PRRC2C	1.08848e-12	0.291134	0.387	0.237	2.14083e-08	Plasma B
CD79A1	1.11339e-10	0.292265	0.769	0.595	2.18981e-06	Plasma B
PPIA	5.07175e-09	0.303012	0.847	0.811	9.97512e-05	Plasma B
LOC102532576	5.46625e-08	0.256155	0.816	0.741	0.0010751	Plasma B
LOC1025322661	4.21596e-05	0.253183	0.54	0.392	0.829195	Plasma B
