# Supplementary material for: Single-Cell Transcriptome Analysis of H5N1-HA-Stimulated Alpaca PBMCs
Source: Biomolecules. 2022 Dec 28;13(1):60. doi: 10.3390/biom13010060 (PMC9855979; doi:10.3390/biom13010060)
Supplement: Supplementary file 1 [file biomolecules-13-00060-s001.zip › Supplemental Table S6. Proportations of T cell subsets in each sample.xlsx]

## Sheet: Sheet1
	CD4+ Naive T	CD4+ Activated T1	CD4+ Activated T2	CD8+ Naive T	CD8+ Activated T	Naive DNT	Activated DNT
HA-0	0.359494	0.133291	0.0141772	0.103291	0.114051	0.00531646	0.27038
HA-1	0.282036	0.111446	0.032589	0.171394	0.133374	0.00865017	0.260511
HA-2	0.285539	0.102696	0.0191176	0.213235	0.116912	0.0137255	0.248775
