# Supplementary material for: Single-Cell Transcriptome Analysis of H5N1-HA-Stimulated Alpaca PBMCs
Source: Biomolecules. 2022 Dec 28;13(1):60. doi: 10.3390/biom13010060 (PMC9855979; doi:10.3390/biom13010060)
Supplement: Supplementary file 1 [file biomolecules-13-00060-s001.zip › Supplementary Figures.pdf]

# Single-cell transcriptome profiling of the HA-specific immune response in the Alpaca

Menghua Lyu<sup>1,2#</sup>, Xuyang Shi<sup>1#</sup>, Yang Liu<sup>1</sup>, Hongyan Zhao<sup>1</sup>, Yue Yuan<sup>1</sup>, Run Xie<sup>1</sup>, Ying Gu<sup>1</sup>, Yuliang Dong<sup>1</sup>, Meiniang Wang<sup>1\*</sup>

1. BGI-Shenzhen, Shenzhen 518083, China
2. College of Life Science and Agronomy, Zhoukou Normal University, Zhoukou 466001, China

<sup>#</sup>These authors contribute equally to this work

**\*Correspondence:**

Meiniang Wang

wangmeiniang@genomics.cn

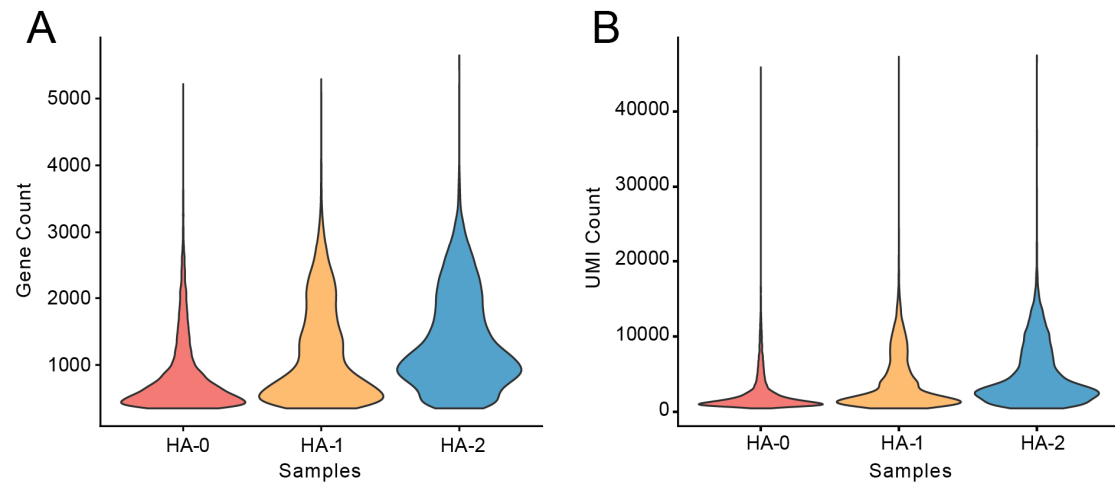

**Supplementary Figure S1. scRNA-seq data quality control of alpaca's PBMCs in each sampling time.** Violin plot for the distribution of (A) gene number, (B) UMI number.

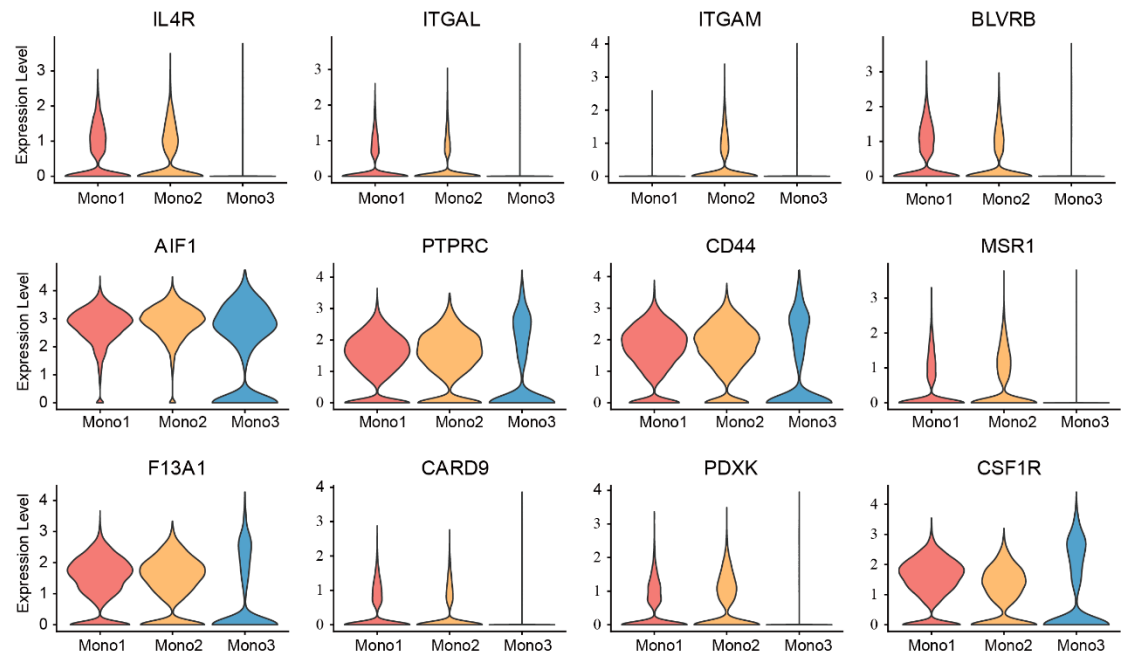

**Supplementary Figure S2. Violin plots show the expression levels of mark genes in each subset of monocyte.**

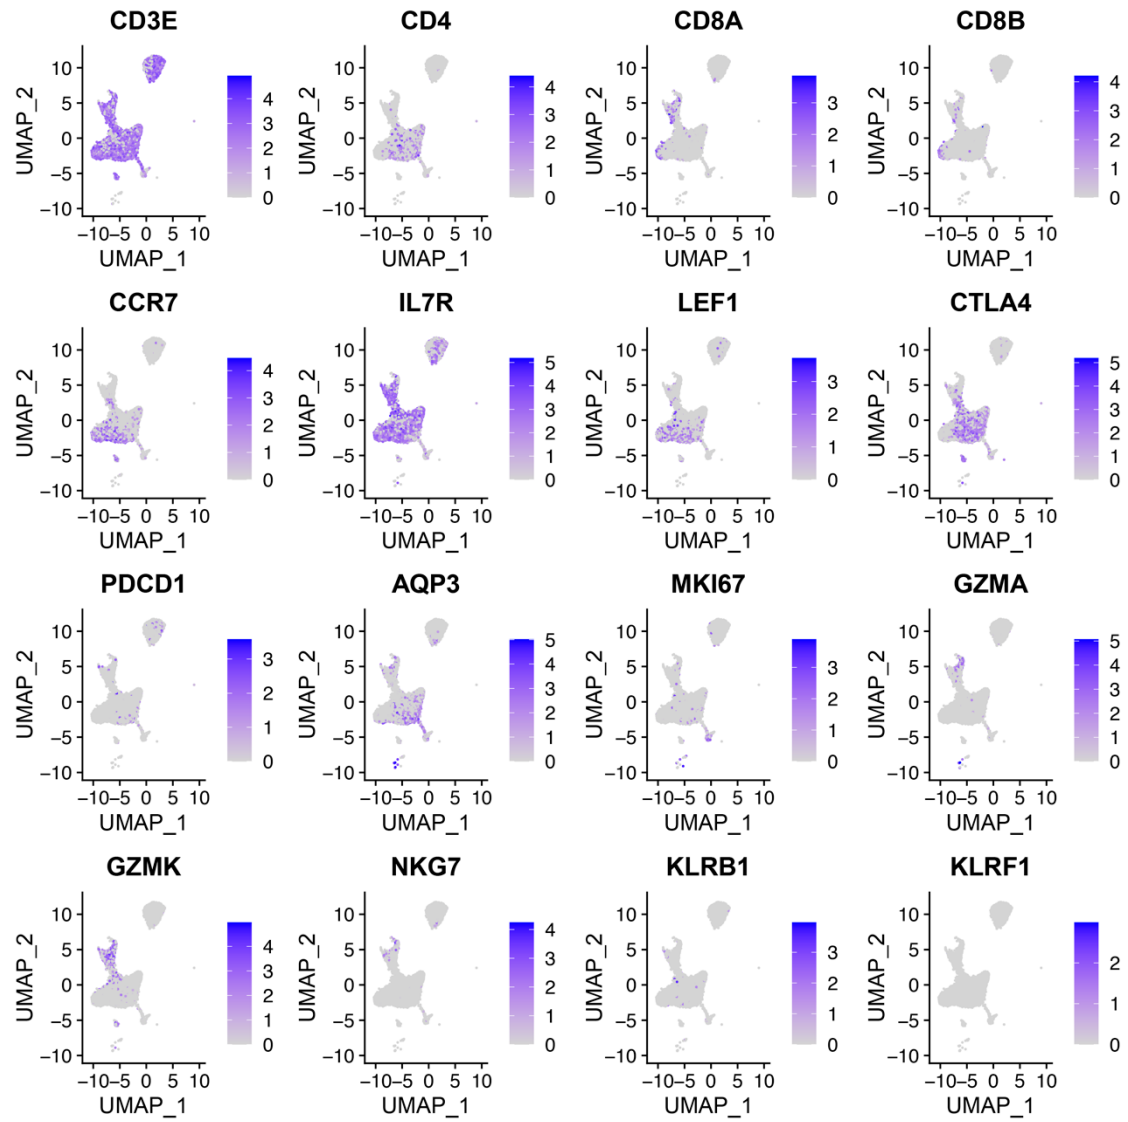

**Supplementary Figure S3.** Feature plots show the expression levels of mark genes in each T cell subset.
